# Supplementary material for: Thermodynamic insights on desalination processes: exergy analysis, minimum separation work, and advances in capacitive deionization with battery electrodes
Source: Royal Society of Chemistry journal article supplement (doi:10.1039/d6ra00658b), 2026-04-16
Supplement: d6ra00658b1.pdf [file d6ra00658b1.pdf]

# Thermodynamic Insights on Desalination Processes: Exergy Analysis, Minimum Separation Work, and Advances in Capacitive Deionization with Battery Electrode

Ayoub TAKTOUR<sup>1</sup>, Abderrahman MELLALOU<sup>1</sup>, Abdelkader OUTZOURHIT<sup>1</sup>, Fouad GHAMOUSS<sup>1</sup>.

<sup>1</sup> Materials Science, Energy, and Nano-engineering Department, Mohammed VI Polytechnic University, Ben Guerir, Morocco

Supporting information

Crafting a high-quality review paper constitutes a crucial phase in a research project, serving to elucidate the existing state of knowledge, reconcile apparent contradictions, pinpoint areas requiring further investigation, and establish consensus in situations where none was previously present [1].

## B Overview of Exergy variation in desalination technologies

the mathematical representation of exergy, denoted as  $e$ , is as follows:[2]

$$e = (u - u^*) + p_0(v - v^*) - T_0(s - s^*) + \sum_{i=1}^n x_i(\mu_i^* - \mu_{i,0})/M_i \quad (1)$$

In the given expressions, where  $u$ ,  $v$ ,  $s$ ,  $m$ , and  $x$  represent specific internal energy, specific volume, specific entropy, chemical potential, and mass fraction, respectively. The properties denoted with (\*) in the equation are evaluated at the temperature and pressure of the environment, maintaining the same composition or concentration as the initial state. This condition is known as the restricted dead state, where only temperature and pressure are adjusted to match environmental values. Conversely, properties denoted with (0) in the equation are determined at the temperature, pressure, and concentration of the environment, referred to as the global dead state.

In the initial scenario where  $P = P_0$  and  $x = x_0$ , the chemical exergy (represented as the last term in Eq (1)) becomes zero. The exergy expression for an ideal gas mixture can then be formulated as follows:

$$e = c_v(T - T_0) + p_0 \left( \frac{RT}{p} - \frac{RT_0}{p_0} \right) - T_0 \left[ c_p \ln \left( \frac{T}{T_0} \right) - R \ln \left( \frac{p}{p_0} \right) \right] \quad (2)$$

$$(P = P_0)$$

$$e = c_v(T - T_0) + R(T - T_0) - T_0 c_p \ln \left( \frac{T}{T_0} \right) \quad (3)$$

With ( $c_p = c_v + R$ )

$$e = c_p T_0 \left[ \frac{T}{T_0} - \ln \left( \frac{T}{T_0} \right) - 1 \right] \quad (4)$$

In the second scenario where  $T = T_0$  and  $x = x_0$ , the same as before the chemical exergy term becomes zero and the exergy can be written for an ideal gas mixture as

$$e = c_v(T - T_0) + p_0 \left( \frac{RT}{p} - \frac{RT_0}{p_0} \right) - T_0 \left[ c_p \ln \left( \frac{T}{T_0} \right) - R \ln \left( \frac{p}{p_0} \right) \right] \quad (5)$$

( $T = T_0$ ), thus

$$e = RT_0 \left[ \frac{p_0}{p} + \ln \left( \frac{p}{p_0} \right) - 1 \right] \quad (6)$$

In the third scenario where  $T = T_0$  and  $P = P_0$ , the initial two terms in the exergy equation (as per Eq (1)) disappear. The sole remaining term is the final one, representing chemical exergy. The exergy in this instance can be expressed as follows:

$$e = \sum_{i=1}^n x_i (\mu_i^* - \mu_i^0) \quad (7)$$

In the context of an optimal blend model or an ideal mixture model, the disparities in chemical potential are expressed as.

$$e = \sum_{i=1}^n x_i R_i T \ln \left( \frac{x_i}{x_{i,0}} \right) \quad (8)$$

Assuming a mixture composed of two substances leads to the following.

$$e = x_1 R_1 T \ln \left( \frac{x_1}{x_{1,0}} \right) + x_2 R_2 T \ln \left( \frac{x_2}{x_{2,0}} \right) \quad (9)$$

Additionally, it is within our knowledge that  $(x_1 = 1 - x_2)$  and  $(x_{1,0} = 1 - x_{2,0})$

$$e = RT_0 \left[ (1 - x) \ln \left( \frac{1 - x}{1 - x_0} \right) + x \ln \left( \frac{x}{x_0} \right) \right] \quad (10)$$

## C Separation and Mixing in Desalination

Considering two ideal gases separated by a physical barrier in a container.

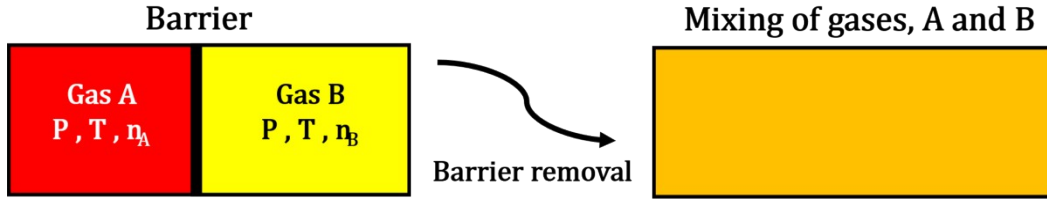

Figure 1 Schematic illustration of the mixing of two gases

$$G = \sum_j n_j \mu_j \quad (11)$$

$$G^i = n_A \mu_A^i + n_B \mu_B^i \quad ; \quad G^f = n_A \mu_A^f + n_B \mu_B^f \quad (12)$$

As  $\Delta G_{mix} = (G^f - G^i)$ , the change in free energy is given by:

$$\Delta G_{mix} = n_A (\mu_A^f - \mu_A^i) + n_B (\mu_B^f - \mu_B^i) \quad (13)$$

We need to recall  $\left(\frac{\partial \mu_j}{\partial P}\right)_T = V_{m,j}$ , molar volume.

$$d\mu_j = V_{m,j} dP \quad (14)$$

Form Eq (4), the following can be written.

$$d\mu_j = RT \frac{dP}{P} \quad (15)$$

$$\int_{\mu_j^i}^{\mu_j^f} d\mu_j = RT \int_P^{P_j} \frac{dP}{P} \quad (16)$$

$$\mu_j^f - \mu_j^i = RT \ln \left( \frac{P_j}{P} \right) \quad (17)$$

Thus

$$\Delta G_{mix} = n_A RT \ln \left( \frac{P_A}{P} \right) + n_B RT \ln \left( \frac{P_B}{P} \right) \quad (18)$$

According to Dalton's law  $\left(\frac{P_j}{P} = x_j\right)$  and, as  $(n_j = n x_j)$  hence:

$$\Delta G_{mix} = n_A RT \ln x_A + n_B RT \ln x_B \quad (19)$$

$$\Delta G_{mix} = nRT (x_A \ln(x_A) + x_B \ln(x_B)) \quad (20)$$

Where,  $R$  is the gas constant ( $8.314 J/(mol \cdot K)$ ),  $T$  is the temperature in Kelvin,  $x_A$  and  $x_B$  are the mole fractions of the two components in the solution. This equation describes the free energy change associated with the mixing of two components in an ideal solution. If  $\Delta G_{mix}$  is negative, it suggests that the mixing is favorable. For the case of desalination, particularly in the context of water desalination, it typically involves the separation of salt (solute) from water (solvent). The process of desalination often requires energy input, and the Gibbs free energy is a thermodynamic parameter that provides insights into the spontaneity of the process. In the context of desalination, the Gibbs free energy change  $\Delta G_{mix}$  can be related to the work done  $W$  by the equation:

$$\Delta G_{mix} = W_{non-PV} \quad (21)$$

where  $W_{non-PV}$  is the non-pressure-volume work associated with the process. This work is required to overcome the thermodynamic barrier for separating solute from the solvent. In desalination processes such as reverse osmosis or distillation, the reduction in  $\Delta G_{mix}$  is achieved by applying external energy, often in the form of pressure or heat, to drive the separation. The specifics of the equations involved would depend on the particular desalination process under consideration. Consequently, when examining the Gibbs free energy of mixing in the context of an ideal two-component solution, and specifically in relation to desalination processes, certain considerations come into play.

$$\Delta_{mix}G = nRT [x_S \ln(x_S) + x_W \ln(x_W)] \quad (22)$$

$$x_W \text{ molar fraction of Water} \quad x_S \text{ molar fraction of Salt} \quad x_W = 1 - x_S$$

$$\Delta_{mix}G = nRT [x_S \ln(x_S) + (1 - x_S) \ln(1 - x_S)] \quad (23)$$

with Taylor series expansion and dilute solution approximation (i.e.,  $x_S \ll 1$ ) using  $\ln(1 - x_S) \approx -x_S$  to yield.

$$\Delta_{mix}G \approx nRT x_S [\ln(x_S) - 1] \quad (24)$$

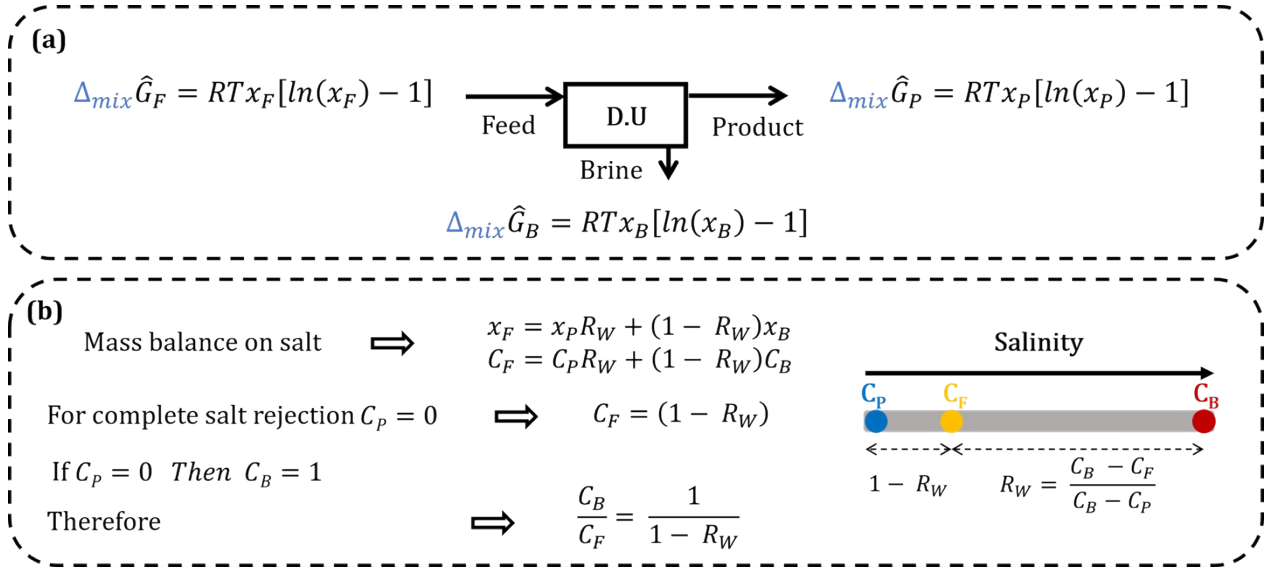

Figure 2 (a) The primary streams of a desalination unit, (b) Mass balance on salt for desalination process

The Gibbs free energy of separation for a desalination process:

$$\Delta_{sep}G = \Delta_{mix}G_P + \Delta_{mix}G_B - \Delta_{mix}G_F \quad (25)$$

$$\Delta_{sep}\hat{G} = R_W\Delta_{mix}\hat{G}_P + (1 - R_W)\Delta_{mix}\hat{G}_B - \Delta_{mix}\hat{G}_F \quad (26)$$

Specific energy consumption (SEC) is defined as

$$SEC_{min} = \frac{\Delta_{sep}\hat{G}}{R_W\hat{V}_w} = \frac{R_W\Delta_{mix}\hat{G}_P + (1 - R_W)\Delta_{mix}\hat{G}_B - \Delta_{mix}\hat{G}_F}{R_W\hat{V}_w} \quad (27)$$

$$SEC_{min} = \frac{RT}{\hat{V}_w} \left[ \frac{x_F}{R_W} \ln \left( \frac{x_B}{x_F} \right) - x_P \ln \left( \frac{x_B}{x_P} \right) \right] \quad (28)$$

Using  $x_s = v C_s \hat{V}_w$ , where  $v$  is the number of dissociated ions per salt molecule (2 for NaCl)

$$SEC_{min} = 2RT \left[ \frac{C_F}{R_W} \ln \left( \frac{C_B}{C_F} \right) - C_P \ln \left( \frac{C_B}{C_P} \right) \right] \quad (29)$$

For complete salt rejection  $C_P = 0$ , and the van't Hoff relation  $\pi_f = 2RTC_f$

$$SEC_{min} = \frac{2RTC_F}{R_W} \ln \left( \frac{C_B}{C_F} \right) \quad (30)$$

$$SEC_{min} = -\frac{\pi_F}{R_W} \ln (1 - R_W) \quad (31)$$

The  $SEC_{min}$  is determined only by the feed Osmotic Pressure  $\pi_f$  and water Recovery Ratio  $R_W$ .

Thermodynamic energy efficiency (TEE) is defined as:

$$TTE = \frac{\Delta G_{mix}}{SEC_{min}} = \frac{\Delta G_{ion}}{SEC_{ion}} \quad (32)$$

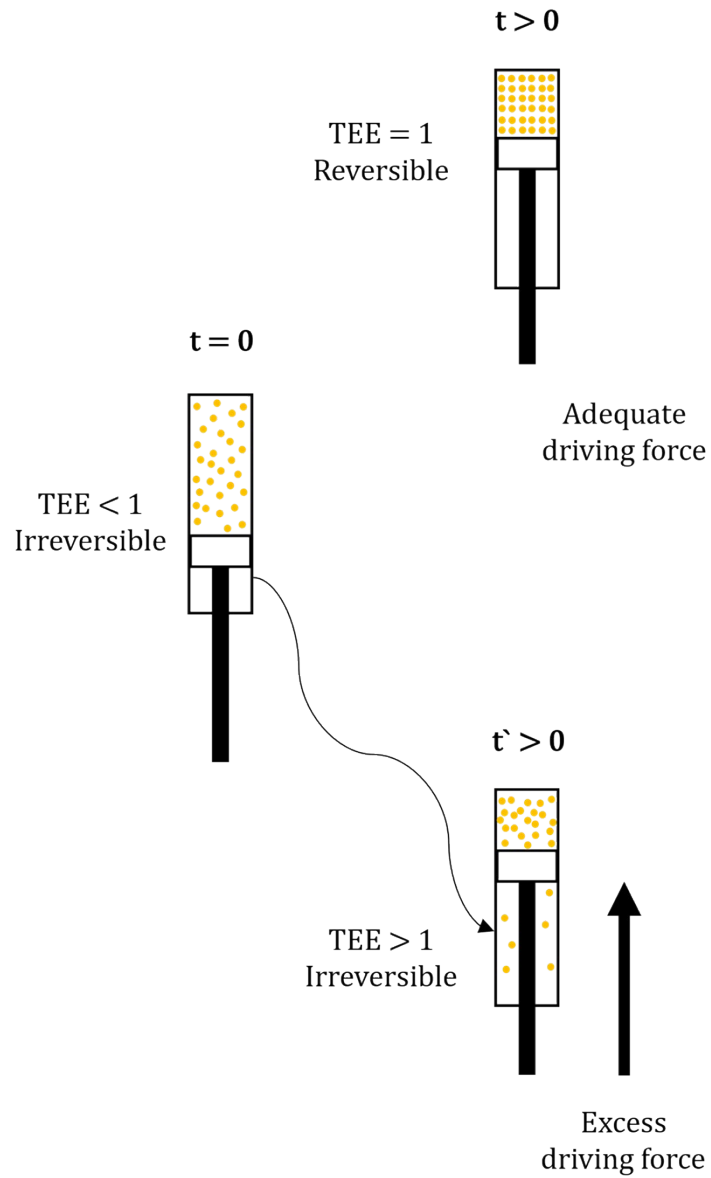

Figure 3 illustration of TEE

## Desalination technologies data

### Distillation

Table 1 Distillation data

| $C_0$ (mM) | $R_w$ (%) | $\Delta G_w$ (Wh/m <sup>3</sup> ) | SEC (Wh/m <sup>3</sup> ) | TEE (%) | Rf   |
|------------|-----------|-----------------------------------|--------------------------|---------|------|
| 657        | 28        | 1093.3                            | 24786                    | 4.4     | [3]  |
| 717        | 40        | 1280.7                            | 14659.5                  | 8.7     | [4]  |
| 846        | 9         | 1249.6                            | 16791.3                  | 7.4     | [4]  |
| 682        | 6         | 993.7                             | 19906.5                  | 5       | [5]  |
| 768        | 14        | 1178.3                            | 14493.2                  | 8.1     | [6]  |
| 700        | 50        | 1396.3                            | 20566.4                  | 6.8     | [7]  |
| 879        | 8         | 1301.8                            | 18194.3                  | 7.2     | [8]  |
| 768        | 18        | 1223.6                            | 13398.8                  | 9.1     | [9]  |
| 717        | 41        | 1263.5                            | 17207.3                  | 7.3     | [10] |
| 717        | 38        | 1232.1                            | 15881.8                  | 7.8     | [10] |
| 717        | 39        | 1244.8                            | 17240.4                  | 7.2     | [11] |
| 768        | 28        | 1267.5                            | 18965.4                  | 6.7     | [11] |
| 768        | 17        | 1164                              | 10206.3                  | 11.4    | [11] |
| 665        | 40        | 1208.8                            | 22769.3                  | 5.3     | [12] |
| 109        | 31        | 173.8                             | 17827.7                  | 1       | [13] |
| 597        | 21        | 920                               | 9289.3                   | 9.9     | [14] |
| 597        | 33        | 999.7                             | 10797.5                  | 9.3     | [15] |
| 699        | 48        | 1305.6                            | 6354.9                   | 20.5    | [15] |
| 61         | 70        | 1449.5                            | 24684.8                  | 5.9     | [16] |
| 61         | 55        | 1222                              | 13272.3                  | 9.2     | [17] |
| 67         | 40        | 1208.9                            | 23791.6                  | 5.1     | [18] |
| 72         | 34        | 1249.1                            | 12585.1                  | 9.9     | [19] |
| 11         | 98        | 632.7                             | 22145.6                  | 2.9     | [13] |
| 60         | 33        | 1027.3                            | 26498.1                  | 3.9     | [13] |
| 82         | 16        | 1256.4                            | 34048.8                  | 3.7     | [20] |
| 68         | 29        | 1223.4                            | 15478.2                  | 7.9     | [17] |
| 72         | 30        | 1296.9                            | 14310.9                  | 9.1     | [11] |
| 77         | 15        | 1181.5                            | 7756.5                   | 15.2    | [6]  |
| 72         | 33        | 1200.5                            | 12546                    | 9.6     | [21] |
| 89         | 29        | 1478.7                            | 17751.1                  | 8.3     | [22] |
| 76         | 40        | 1363.8                            | 21834                    | 6.2     | [23] |
| 648        | 40        | 1123.3                            | 11501                    | 9.8     | [24] |
| 512        | 90        | 1802.3                            | 26587                    | 6.8     | [25] |
| 717        | 40        | 1243.2                            | 9400                     | 13.2    | [24] |
| 717        | 10        | 1072.6                            | 11800                    | 9.1     | [19] |

## Reverse osmosis (RO)

Table 2 Reverse osmosis data

| $C_0$ (mM) | Rw (%) | $\Delta G_w$ (Wh/m <sup>3</sup> ) | SEC (Wh/m <sup>3</sup> ) | TEE (%) | Rf   |
|------------|--------|-----------------------------------|--------------------------|---------|------|
| 11         | 70     | 26                                | 228                      | 11.4    | [26] |
| 8          | 65     | 18                                | 119                      | 15.3    | [26] |
| 15         | 75     | 39                                | 322                      | 12.1    | [26] |
| 15         | 75     | 39                                | 264                      | 14.8    | [26] |
| 43         | 13     | 64                                | 139                      | 46      | [27] |
| 43         | 23     | 68                                | 133                      | 50.7    | [27] |
| 51         | 81     | 145                               | 556                      | 26.1    | [28] |
| 34         | 79     | 93                                | 378                      | 24.6    | [28] |
| 15         | 75     | 37                                | 333                      | 11.2    | [29] |
| 43         | 66     | 96                                | 389                      | 24.7    | [30] |
| 60         | 75     | 152                               | 472                      | 32.3    | [31] |
| 712        | 45     | 1302                              | 1806                     | 72.1    | [32] |
| 698        | 45     | 1276                              | 1769                     | 72.1    | [32] |
| 602        | 28     | 972                               | 1578                     | 61.6    | [33] |
| 841        | 13     | 1239                              | 1717                     | 72.2    | [33] |
| 975        | 20     | 1447.1                            | 1772.2                   | 81.65   | [34] |
| 686        | 45     | 1217.2                            | 1750                     | 69.56   | [35] |
| 624        | 50     | 1140.8                            | 1611.1                   | 70.81   | [36] |
| 659        | 40     | 1133.1                            | 1811.1                   | 62.56   | [34] |
| 677        | 28     | 1051.3                            | 1638.9                   | 64.15   | [37] |
| 677        | 25     | 997.9                             | 1972.2                   | 50.6    | [37] |
| 568        | 40     | 936.8                             | 1622.2                   | 57.75   | [33] |
| 196        | 34     | 312.6                             | 583.3                    | 53.59   | [38] |
| 257        | 65     | 259.6                             | 583.3                    | 44.51   | [39] |
| 80         | 72     | 157.3                             | 333.3                    | 47.2    | [40] |
| 51         | 81     | 128.1                             | 555.6                    | 23.07   | [28] |
| 68         | 50     | 120.1                             | 416.7                    | 28.81   | [41] |
| 91         | 50     | 116                               | 416.7                    | 27.85   | [42] |
| 39         | 75     | 94.7                              | 833.4                    | 11.37   | [43] |
| 42         | 71     | 90.5                              | 394.5                    | 22.95   | [30] |
| 34         | 79     | 89.7                              | 377.8                    | 23.74   | [28] |
| 62         | 23     | 88.5                              | 133.3                    | 66.38   | [27] |
| 62         | 13     | 85.2                              | 138.9                    | 61.31   | [27] |
| 34         | 75     | 78.8                              | 377.8                    | 20.85   | [44] |
| 46         | 67     | 71.7                              | 416.7                    | 17.21   | [42] |
| 60         | 12     | 63                                | 611                      | 10.3    | [31] |
| 17         | 68     | 34.8                              | 333.4                    | 10.45   | [41] |

|    |    |      |       |      |      |
|----|----|------|-------|------|------|
| 13 | 75 | 31.9 | 322.3 | 9.9  | [26] |
| 13 | 70 | 27.9 | 329.2 | 8.49 | [26] |
| 15 | 50 | 24.2 | 194.4 | 12.4 | [45] |

### Electrodialysis (ED)

Table 3 Electrodialysis data

| $C_0$ (mM)   | $R_w$ (%) | $\Delta G_w$ (Wh/m <sup>3</sup> ) | SEC (Wh/m <sup>3</sup> ) | TEE (%) | Rf   |
|--------------|-----------|-----------------------------------|--------------------------|---------|------|
| 86           | 50        | 109.9                             | 1675                     | 6.56    | [46] |
| 86           | 50        | 109.9                             | 2141.3                   | 5.13    | [46] |
| 86           | 50        | 109.9                             | 2369.2                   | 4.64    | [46] |
| 86           | 50        | 109.9                             | 2717.7                   | 4.04    | [46] |
| 86           | 50        | 109.9                             | 2913.4                   | 3.77    | [46] |
| 10           | 50        | 19.1                              | 133.3                    | 14.31   | [47] |
| 10           | 50        | 19                                | 139.6                    | 13.59   | [48] |
| 10           | 50        | 19.1                              | 291.7                    | 6.54    | [48] |
| 45           | 50        | 59.7                              | 530                      | 11.27   | [42] |
| 48           | 50        | 79                                | 1500                     | 5.27    | [42] |
| 403          | 50        | 132.2                             | 3800                     | 3.48    | [49] |
| 154          | 50        | 146.4                             | 2780                     | 5.27    | [49] |
|              |           | 482.9                             | 1053.7                   | 45.83   | [50] |
|              |           | 482.9                             | 3556.1                   | 13.58   | [50] |
|              |           | 248.8                             | 643.9                    | 38.64   | [50] |
|              |           | 248.8                             | 1317.1                   | 18.89   | [50] |
|              |           | 248.8                             | 2443.9                   | 10.18   | [50] |
| Not Reported |           | 248.8                             | 4639                     | 5.36    | [50] |
|              |           | 102.4                             | 307.3                    | 33.33   | [50] |
|              |           | 102.4                             | 790.2                    | 12.96   | [50] |
|              |           | 102.4                             | 1536.6                   | 6.67    | [50] |
|              |           | 102.4                             | 2912.2                   | 3.52    | [50] |

### Capacitive deionization (CDI)

Table 4 Capacitive deionization data

| $C_0$ (mM) | $C_D$ (mM) | $R_w$ (%) | $\Delta G_w$ (Wh/m <sup>3</sup> ) | SEC (Wh/m <sup>3</sup> ) | TEE (%)      | Type  | Rf   |
|------------|------------|-----------|-----------------------------------|--------------------------|--------------|-------|------|
| 20         | 9.1        | 50        | 8.65                              | 350 - 207                | 2.47 - 4.17  | MCDI  | [51] |
| 20         | 9.8        | 50        | 7.52                              | 320                      | 2.35         | MCDI  | [51] |
| 20         | 12.9       | 50        | 3.57                              | 69.3                     | 5.15         | MCDI  | [51] |
| 3.42       | 0.9        | 60        | 3.18                              | 193                      | 1.65         | MCDI  | [52] |
| 40         | 22.3       | 50        | 11.2                              | 745 - 535                | 1.50 - 2.209 | MCDI  | [53] |
| 3.4        | 0.4        | 60        | 4.88                              | 135                      | 3.6          | MCDI  | [54] |
| 10         | 6.2        | 50        | 2                                 | 177                      | 1.13         | FaCDI | [54] |
| 3.2        | 1.7        | 67        | 1.41                              | 208                      | 0.675        | CDI   | [55] |

|      |      |    |          |              |              |       |      |
|------|------|----|----------|--------------|--------------|-------|------|
| 3    | 1.8  | 67 | 0.88     | 107          | 0.825        | CDI   | [55] |
| 3.5  | 2.4  | 67 | 0.73     | 74.2         | 0.982        | CDI   | [55] |
| 2.9  | 2.6  | 67 | 0.074    | 48.8         | 0.152        | CDI   | [54] |
| 8.7  | 6.8  | 50 | 0.61     | 50           | 1.23         | CDI   | [56] |
| 8.7  | 4.4  | 50 | 0.31     | 2.35         | 0.131        | CDI   | [57] |
| 8.6  | 2.7  | 50 | 0.62     | 343 - 25.7   | 1.80 - 2.240 | MCDI  | [58] |
| 8.6  | 3.3  | 50 | 0.48     | 28.1 - 7.77  | 1.70 - 2.70  | MCDI  | [58] |
| 8.6  | 3.9  | 50 | 0.37     | 30.8 - 6.61  | 1.20 - 2.230 | MCDI  | [58] |
| 8.6  | 4.4  | 50 | 0.29     | 22.7 - 10.9  | 1.30 - 2.70  | MCDI  | [58] |
| 8.6  | 5.3  | 50 | 0.18     | 25.8 - 6.95  | 0.7 - 2.60   | MCDI  | [58] |
| 8.6  | 6.1  | 50 | 0.1      | 20.4 - 4.35  | 0.49 - 2.230 | MCDI  | [58] |
| 10   | 8.6  | 69 | 0.39     | 11.2 - 6.98  | 3.50 - 5.562 | CDI   | [59] |
| 10   | 8.8  | 50 | 0.22     | 16.8         | 1.29         | CDI   | [59] |
| 20   | 18.4 | 50 | 0.18     | 8.34 - 8.817 | 2.12 - 2.216 | CDI   | [60] |
| 5    | 3.5  | 50 | 0.66     | 61.1         | 1107         | CDI   | [56] |
| 5    | 3.8  | 50 | 0.41     | 47.2         | 0.863        | CDI   | [56] |
| 10   | 8.6  | 50 | 0.28     | 29.5 - 2.21  | 0,931 - 1.24 | MCDI  | [61] |
| 10   | 8.5  | 50 | 0.32     | 67.6         | 0.473        | FaCDI | [62] |
| 4.3  | 3.5  | 50 | 0.2      | 47.8         | 0.421        | i-CDI | [63] |
| 4.3  | 3.9  | 50 | 0.057    | 45.7         | 1.24         | i-CDI | [63] |
| 5    | 4.2  | 50 | 0.177    | 52.8         | 0.335        | FaCDI | [64] |
| 5    | 4.3  | 50 | 0.151    | 24.4         | 0.62         | CDI   | [65] |
| 5    | 4.74 | 50 | 0.0186   | 8.58         | 0.217        | CDI   | [65] |
| 5    | 4.9  | 50 | 1.76E-03 | 0.783        | 0.225        | CDI   | [65] |
| 10   | 9.3  | 50 | 0.0619   | 26.2         | 0.236        | CDI   | [66] |
| 5    | 4.7  | 50 | 0.0248   | 10.1         | 0.246        | MCDI  | [67] |
| 20   | 19.3 | 50 | 0.0319   | 35.7 - 21.2  | 0.089 - 0.15 | CDI   | [68] |
| 20   | 19.6 | 50 | 0.011    | 24.7         | 0.0446       | CDI   | [68] |
| 20   | 19.8 | 50 | 3.64E-03 | 8.9          | 0.0409       | CDI   | [68] |
| 4.3  | 4.2  | 50 | 3.20E-03 | 6.77         | 0.0474       | i-CDI | [69] |
| 597  | 388  | 50 | 103.05   | 340          | 30.3         | FaCDI | [70] |
| 521  | 391  | 50 | 45.34    | 241.2        | 18.8         | FaCDI | [71] |
| 25   | 17.3 | 50 | 3.31     | 51.1         | 6.47         | FaCDI | [72] |
| 25   | 16.9 | 50 | 3.66     | 24           | 15.2         | FaCDI | [72] |
| 25   | 17.1 | 50 | 3.49     | 18.7         | 18.7         | FaCDI | [72] |
| 25   | 19   | 50 | 2        | 23.9         | 8.4          | FaCDI | [72] |
| 25   | 19.4 | 50 | 1.75     | 12.6         | 14           | FaCDI | [72] |
| 25   | 19.8 | 50 | 1.5      | 8.4          | 17.8         | FaCDI | [72] |
| 25   | 20.9 | 50 | 0.92     | 13.1         | 7.01         | FaCDI | [72] |
| 25   | 21.3 | 50 | 0.77     | 6.71         | 11.4         | FaCDI | [72] |
| 25   | 21.4 | 50 | 0.73     | 5.05         | 14.5         | FaCDI | [72] |
| 8.56 | 6.4  | 50 | 0.77     | 1.88         | 40.7         | FaCDI | [73] |
| 171  | 1.57 | 50 | 1.61E-03 | 0.34         | 0.5          | FaCDI | [74] |

|       |       |    |      |      |      |       |      |
|-------|-------|----|------|------|------|-------|------|
| 8.54  | 7.58  | 50 | 0.15 | 33.6 | 0.4  | FaCDI | [75] |
| 8.54  | 7.55  | 50 | 0.16 | 65.8 | 0.2  | FaCDI | [75] |
| 8.54  | 7.3   | 50 | 0.25 | 92.6 | 0.3  | FaCDI | [75] |
| 100   | 96.65 | 50 | 0.15 | 48.4 | 0.31 | FaCDI | [76] |
| 13.35 | 12.91 | 50 | 0.02 | 108  | 0.02 | FaCDI | [77] |
| 20    | 18.51 | 50 | 0.15 | 20.8 | 0.72 | FaCDI | [78] |
| 20    | 19.5  | 50 | 0.02 | 15.4 | 0.13 | FaCDI | [78] |

## Electrode Materials for Capacitive Deionization

In this segment, we conducted a search for electrode materials previously employed and examined in capacitive deionization, aqueous sodium ion battery, and aqueous chlorine ion battery applications.

Table 5 Electrode material data for capacitive deionization

| Material                                                                                         | Formula                                                                                           | Average Voltage (V) vs Ag/AgCl sat (KCl) | Electrolyte                                                     | System | Specific capacity (mAh/g) | current density (mA/g) | Rf   |
|--------------------------------------------------------------------------------------------------|---------------------------------------------------------------------------------------------------|------------------------------------------|-----------------------------------------------------------------|--------|---------------------------|------------------------|------|
| <b>1D Na<sub>2</sub>V<sub>6</sub>O<sub>16</sub>, nH<sub>2</sub>O</b>                             | Na <sub>2</sub> V <sub>6</sub> O <sub>16</sub> , nH <sub>2</sub> O                                | -0.2585                                  | 1 M Na <sub>2</sub> SO <sub>4</sub> in H <sub>2</sub> O         | 3 El   | 123                       | 40                     | [79] |
| <b>Na<sub>4</sub>MnV(PO<sub>4</sub>)<sub>3</sub>-rGO</b>                                         | Na <sub>4</sub> MnV(PO <sub>4</sub> ) <sub>3</sub> -rGO                                           | 0.41                                     | 1 M Na <sub>2</sub> SO <sub>4</sub> in H <sub>2</sub> O         | 3 El   | 49                        | 1 C                    | [80] |
| <b>Hollow K<sub>0.27</sub>MnO<sub>2</sub> nanospheres</b>                                        | K <sub>0.27</sub> MnO <sub>2</sub>                                                                | 0.544                                    | 2 M Na <sub>2</sub> SO <sub>4</sub> in H <sub>2</sub> O         | 3 El   | 83                        | 200                    | [81] |
| <b>Na<sub>2</sub>FeP<sub>2</sub>O<sub>7</sub></b>                                                | Na <sub>2</sub> FeP <sub>2</sub> O <sub>7</sub>                                                   | -0.006                                   | 1 M Na <sub>2</sub> SO <sub>4</sub> in H <sub>2</sub> O         | 3 El   | 55                        | 1 C                    | [82] |
| <b>NaTi<sub>2</sub>(PO<sub>4</sub>)<sub>3</sub>/C</b>                                            | NaTi <sub>2</sub> (PO <sub>4</sub> ) <sub>3</sub> /C                                              | -0.6                                     | 1 M Na <sub>2</sub> SO <sub>4</sub> in H <sub>2</sub> O         | 3 El   | 101                       | 500                    | [83] |
| <b>NaMnO<sub>2</sub></b>                                                                         | NaMnO <sub>2</sub>                                                                                | 0.5                                      | Aqueous 2 M CH <sub>3</sub> COONa                               | 3 El   | 55                        | 1 C                    | [84] |
| <b>Na<sub>4</sub>Mn<sub>9</sub>O<sub>18</sub>-RGO</b>                                            | Na <sub>4</sub> Mn <sub>9</sub> O <sub>18</sub> -RGO                                              | 0.543                                    | 1 M Na <sub>2</sub> SO <sub>4</sub> and 0.5 M ZnSO <sub>4</sub> | 2 El   | 61.7                      | 4 C                    | [85] |
| <b>Crossing-linked Na<sub>2</sub>VTi(PO<sub>4</sub>)<sub>3</sub>@C</b>                           | Na <sub>2</sub> VTi(PO <sub>4</sub> ) <sub>3</sub> @C                                             | -0.6                                     | 1 M Na <sub>2</sub> SO <sub>4</sub> in H <sub>2</sub> O         | 3 El   | 62.3                      | 0.5 C                  | [86] |
| <b>Crossing-linked Na<sub>2</sub>VTi(PO<sub>4</sub>)<sub>3</sub>@C</b>                           | Na <sub>2</sub> VTi(PO <sub>4</sub> ) <sub>3</sub> @C                                             | 0.3                                      | 1 M Na <sub>2</sub> SO <sub>4</sub> in H <sub>2</sub> O         | 3 El   | 63                        | 0.5 C                  | [87] |
| <b>Bi<sub>2</sub>O<sub>3</sub>@C nanoflake</b>                                                   | Bi <sub>2</sub> O <sub>3</sub> @C                                                                 | -0.081                                   | 1 M Na <sub>2</sub> SO <sub>4</sub> + 2 M NaCl                  | 3 El   | 207                       | 2000                   | [88] |
| <b>Pristine Bi<sub>2</sub>O<sub>3</sub></b>                                                      | Bi <sub>2</sub> O <sub>3</sub>                                                                    | -0.081                                   | 1 M Na <sub>2</sub> SO <sub>4</sub> + 2 M NaCl                  | 3 El   | 245                       | 2000                   | [88] |
| <b>NaTi<sub>2</sub>(PO<sub>4</sub>)<sub>3</sub></b>                                              | NaTi <sub>2</sub> (PO <sub>4</sub> ) <sub>3</sub>                                                 | 0.55                                     | 1M NaCl in H <sub>2</sub> O                                     | 2 El   | 52                        | 1000                   | [89] |
| <b>Na<sub>3</sub>MnTi(PO<sub>4</sub>)<sub>3</sub></b>                                            | Na <sub>3</sub> MnTi(PO <sub>4</sub> ) <sub>3</sub>                                               | 0.5                                      | 1 M Na <sub>2</sub> SO <sub>4</sub> in H <sub>2</sub> O         | 3 El   | 60                        | 0.5 C                  | [90] |
| <b>NaVPO<sub>4</sub>F</b>                                                                        | NaVPO <sub>4</sub> F                                                                              | 0.544                                    | 5 M NaNO <sub>3</sub>                                           | 3 El   | 54                        | 50                     | [91] |
| <b>Na<sub>0.44</sub>MnO<sub>2</sub></b>                                                          | Na <sub>0.44</sub> MnO <sub>2</sub>                                                               | 0.419                                    | 1 M sodium perchlorate + 0.5 M sodium sulfate                   | 3 El   | 34                        | 121                    | [92] |
| <b>NaTi<sub>2</sub>(PO<sub>4</sub>)<sub>3</sub></b>                                              | NaTi <sub>2</sub> (PO <sub>4</sub> ) <sub>3</sub>                                                 | -0.75                                    | 2 M Na <sub>2</sub> SO <sub>4</sub> in H <sub>2</sub> O         | 3 El   | 133                       | 2.0 mA cm <sup>2</sup> | [93] |
| <b>Na<sub>4</sub>Mn<sub>9</sub>O<sub>18</sub></b>                                                | Na <sub>4</sub> Mn <sub>9</sub> O <sub>18</sub>                                                   | 0.488                                    | 1 M Na <sub>2</sub> SO <sub>4</sub> in H <sub>2</sub> O         | 3 El   | 45                        | 0.5                    | [94] |
| <b>NaTi<sub>2</sub>(PO<sub>4</sub>)<sub>3</sub>/graphene NTPG-3</b>                              | NTPG-3                                                                                            | -0.75                                    | 1 M Na <sub>2</sub> SO <sub>4</sub> in H <sub>2</sub> O         | 3 El   | 129.3                     | 130                    | [95] |
| <b>Na<sub>7</sub>V<sub>4</sub>(P<sub>2</sub>O<sub>7</sub>)<sub>4</sub>(PO<sub>4</sub>)/C</b>     | Na <sub>7</sub> V <sub>4</sub> (P <sub>2</sub> O <sub>7</sub> ) <sub>4</sub> (PO <sub>4</sub> )/C | 0.794                                    | 1 M Na <sub>2</sub> SO <sub>4</sub> in H <sub>2</sub> O         | 3 El   | 51.2                      | 80                     | [96] |
| <b>Carbon-Coated Na<sub>2.2</sub>V<sub>1.2</sub>Ti<sub>0.8</sub>(PO<sub>4</sub>)<sub>3</sub></b> | Na <sub>2.2</sub> V <sub>1.2</sub> Ti <sub>0.8</sub> (PO <sub>4</sub> ) <sub>3</sub>              | 0.325                                    | 6 M NaClO <sub>4</sub> in H <sub>2</sub> O                      | 3 El   | 61.7                      | 1 C                    | [97] |

|                                                                                                                       |                                                                                                         |         |                                                                            |      |         |                        |       |
|-----------------------------------------------------------------------------------------------------------------------|---------------------------------------------------------------------------------------------------------|---------|----------------------------------------------------------------------------|------|---------|------------------------|-------|
| <b>Na<sub>0.5</sub>Ti<sub>0.5</sub>Mn<sub>0.5</sub>O<sub>2</sub></b>                                                  | Na <sub>0.5</sub> Ti <sub>0.5</sub> Mn <sub>0.5</sub> O <sub>2</sub>                                    | 0.41    | 6 M NaClO <sub>4</sub> in H <sub>2</sub> O                                 | 3 El | 46      | 30                     | [98]  |
| <b>NaFePO<sub>4</sub></b>                                                                                             | NaFePO <sub>4</sub>                                                                                     | 0.03    | 1 M Na <sub>2</sub> SO <sub>4</sub> in H <sub>2</sub> O                    | 3 El | 70      | C/10                   | [99]  |
| <b>Na<sub>3</sub>V<sub>2</sub>(PO<sub>4</sub>)<sub>3</sub></b>                                                        | Na <sub>3</sub> V <sub>2</sub> (PO <sub>4</sub> ) <sub>3</sub>                                          | 0.4     | 1 M Na <sub>2</sub> SO <sub>4</sub> in H <sub>2</sub> O                    | 3 El | 94.5    | 1176                   | [100] |
| <b>Na<sub>3</sub>V<sub>2</sub>O<sub>2</sub>x(PO<sub>4</sub>)<sub>2</sub>F<sub>3-2x</sub>/MWCNT</b>                    | Na <sub>3</sub> V <sub>2</sub> O <sub>2</sub> x(PO <sub>4</sub> ) <sub>2</sub> F <sub>3-2x</sub> /MWCNT | 0.7     | —————                                                                      | 3 El | 46      | 65                     | [101] |
| <b>Na<sub>4</sub>Fe<sub>3</sub>(PO<sub>4</sub>)<sub>2</sub>P<sub>2</sub>O<sub>7</sub></b>                             | Na <sub>4</sub> Fe <sub>3</sub> (PO <sub>4</sub> ) <sub>2</sub> P <sub>2</sub> O <sub>7</sub>           | 0.1     | 1 M Na <sub>2</sub> SO <sub>4</sub> in H <sub>2</sub> O                    | 3 El | 84      | 129                    | [102] |
| <b>P2-type layered Na<sub>2/3</sub>Ni<sub>1/4</sub>Mn<sub>3/4</sub>O<sub>2</sub></b>                                  | Na <sub>2/3</sub> Ni <sub>1/4</sub> Mn <sub>3/4</sub> O <sub>2</sub>                                    | 0.45    | 1 M Na <sub>2</sub> SO <sub>4</sub> in H <sub>2</sub> O                    | 3 El | 40      | 0.1 C                  | [103] |
| <b>Na<sub>0.58</sub>MnO<sub>2</sub> · 0.48H<sub>2</sub>O</b>                                                          | Na <sub>0.58</sub> MnO <sub>2</sub> · 0.48H <sub>2</sub> O                                              | 0.35    | 1 M Na <sub>2</sub> SO <sub>4</sub> in H <sub>2</sub> O                    | 3 El | 79      | 1 C                    | [104] |
| <b>Na<sub>0.7</sub>MnO<sub>2.05</sub></b>                                                                             | Na <sub>0.7</sub> MnO <sub>2.05</sub>                                                                   | 0.444   | 1 M Na <sub>2</sub> SO <sub>4</sub> in H <sub>2</sub> O                    | 3 El | 22.1    | 50                     | [105] |
| <b>Na<sub>2</sub>Ti<sub>3/2</sub>Mn<sub>1/2</sub>(PO<sub>4</sub>)<sub>3</sub> nanodots planted in a carbon matrix</b> | Na <sub>2</sub> Ti <sub>3/2</sub> Mn <sub>1/2</sub> (PO <sub>4</sub> ) <sub>3</sub>                     | -0.5    | 6 M NaClO <sub>4</sub> in H <sub>2</sub> O                                 | 3 El | 78.8    | 0.5C                   | [106] |
| <b>Na<sub>3</sub>MgTi(PO<sub>4</sub>)<sub>3</sub></b>                                                                 | Na <sub>3</sub> MgTi(PO <sub>4</sub> ) <sub>3</sub>                                                     | -0.45   | 6 M NaClO <sub>4</sub> in H <sub>2</sub> O                                 | 3 El | 54      | 0.2 C                  | [107] |
| <b>C-LiTi<sub>2</sub>(PO<sub>4</sub>)<sub>3</sub></b>                                                                 | LiTi <sub>2</sub> (PO <sub>4</sub> ) <sub>3</sub>                                                       | -0.847  | 0.5 M Na <sub>2</sub> SO <sub>4</sub> in H <sub>2</sub> O                  | 3 El | 91      | 138                    | [108] |
| <b>Na<sub>0.66</sub>[Mn<sub>0.66</sub>Ti<sub>0.34</sub>]O<sub>2</sub></b>                                             | Na <sub>0.66</sub> [Mn <sub>0.66</sub> Ti <sub>0.34</sub> ]O <sub>2</sub>                               | -1.3055 | 1 M Na <sub>2</sub> SO <sub>4</sub> in H <sub>2</sub> O                    | 3 El | 76      | 2 C                    | [109] |
| <b>FePO<sub>4</sub>·2H<sub>2</sub>O nanocube (m-NiHCF)</b>                                                            | FePO <sub>4</sub> ·2H <sub>2</sub> O                                                                    | -0.2    | 1 M Na <sub>2</sub> SO <sub>4</sub> in H <sub>2</sub> O                    | 3 El | 80      | 0.5C                   | [110] |
| <b>NaCuHCF</b>                                                                                                        | m-NiHCF                                                                                                 | 0.55    | 5 M (NaClO <sub>4</sub> ) in H <sub>2</sub> O                              | 3 El | 70.1    | 100                    | [111] |
| <b>Na<sub>2</sub>NiFe(CN)<sub>6</sub></b>                                                                             | NaCuHCF                                                                                                 | 0.5     | 1 M Na <sub>2</sub> SO <sub>4</sub> in H <sub>2</sub> O                    | 3 El | 71      | 60                     | [112] |
| <b>Nickel hexacyanoferrate (NiHCF)</b>                                                                                | Na <sub>2</sub> NiFe(CN) <sub>6</sub>                                                                   | 0.45    | 1 M Na <sub>2</sub> SO <sub>4</sub> in H <sub>2</sub> O                    | 3 El | 65      | 65                     | [113] |
| <b>Na<sub>2</sub>MnFe(CN)<sub>6</sub> hexacyanoferrates</b>                                                           | NiHCF                                                                                                   | 0.4     | 1 M Na <sub>2</sub> SO <sub>4</sub> in H <sub>2</sub> O                    | 3 El | 98.88   | 1 mA cm <sup>-2</sup>  | [114] |
| <b>NaFe<sub>2</sub>(CN)<sub>6</sub> Prussian</b>                                                                      | Na <sub>2</sub> MnFe(CN) <sub>6</sub>                                                                   | 0.75    | 1 M NaClO <sub>4</sub> in H <sub>2</sub> O                                 | 2 El | 116     | 2.0 mA cm <sup>2</sup> | [115] |
| <b>CoCuHCF</b>                                                                                                        | NaFe <sub>2</sub> (CN) <sub>6</sub>                                                                     | 0.093   | 1 M Na <sub>2</sub> SO <sub>4</sub> in H <sub>2</sub> O                    | 3 El | 50      | 1C                     | [116] |
| <b>Prussian blue FeFe(CN)<sub>6</sub></b>                                                                             | CoCuHCF                                                                                                 | 0.348   |                                                                            | 3 El | 40      | 1000                   | [117] |
| <b>Na<sub>2</sub>CoFe(CN)<sub>6</sub></b>                                                                             | FeFe(CN) <sub>6</sub>                                                                                   | 0.4     | 1 M Na <sub>2</sub> SO <sub>4</sub> in H <sub>2</sub> O                    | 3 El | 125     | 250                    | [118] |
| <b>Cobalt Hexacyanoferrate (CoHCF)</b>                                                                                | Na <sub>2</sub> CoFe(CN) <sub>6</sub>                                                                   | 0.55    | 1 M Na <sub>2</sub> SO <sub>4</sub> in H <sub>2</sub> O                    | 3 El | 130     | 130                    | [119] |
| <b>Na<sub>0.4</sub>(VO)<sub>3</sub>[Fe(CN)<sub>6</sub>]<sub>2.12</sub>H<sub>2</sub>O</b>                              | CoHCF                                                                                                   | 0.6     |                                                                            | 3 El | 130     |                        | [120] |
| <b>Na<sub>2</sub>CuFe(CN)<sub>6</sub></b>                                                                             | Na <sub>0.4</sub> (VO) <sub>3</sub> [Fe(CN) <sub>6</sub> ] <sub>2.12</sub> H <sub>2</sub> O             | 0.8     | 0.5 M Na <sub>2</sub> SO <sub>4</sub> + 5 M H <sub>2</sub> SO <sub>4</sub> | 3 El | 80.1    | 110                    | [121] |
| <b>Na<sub>2</sub>Zn<sub>3</sub>[Fe(CN)<sub>6</sub>]<sub>2</sub></b>                                                   | Na <sub>2</sub> CuFe(CN) <sub>6</sub>                                                                   | 0.5     |                                                                            |      | 71      | 60                     | [122] |
| <b>PTCDI nanofiber</b>                                                                                                | Na <sub>2</sub> Zn <sub>3</sub> [Fe(CN) <sub>6</sub> ] <sub>2</sub>                                     | 0.428   | 1 M NaClO <sub>4</sub> in H <sub>2</sub> O                                 | 3 El | 41      | 120                    | [123] |
| <b>PNTCDA</b>                                                                                                         | PTCDI                                                                                                   | -0.1    | 1 M Na <sub>2</sub> SO <sub>4</sub> in H <sub>2</sub> O                    | 3 El | 110     | 30                     | [124] |
| <b>Polyimide</b>                                                                                                      | PNTCDA                                                                                                  | -0.456  | 1 M NaNO <sub>3</sub> in H <sub>2</sub> O                                  | 3 El | 154     | 1000                   | [125] |
| <b>(H)SNDI</b>                                                                                                        | Polyimide                                                                                               | -0.306  | 5 M NaNO <sub>3</sub>                                                      | 3 El | 165     | 50                     | [126] |
| <b>Tubular polyaniline decorated with Prussian blue nanocrystals</b>                                                  | (H)SNDI                                                                                                 | -0.197  |                                                                            | 3 El | 60      | 86                     | [127] |
| <b>Polypyrrole grafted activated carbon and MnO<sub>2</sub> electrodes</b>                                            | PA/PANI_PB                                                                                              | 0.4     | 500 mg L <sup>-1</sup> NaCl                                                |      | 157     |                        | [128] |
| <b>Polyaniline nanotubes doped</b>                                                                                    | Py/AC/MnO <sub>2</sub>                                                                                  | 0.3     | 850 mg L <sup>-1</sup> NaCl                                                | 3 EL | 30.5    |                        | [129] |
|                                                                                                                       | PA/AC                                                                                                   | 0.3     | 1 M NaCl                                                                   | 3 EL | 80.2778 |                        | [130] |

|                                                                                                   |                                                |        |                               |      |           |      |       |
|---------------------------------------------------------------------------------------------------|------------------------------------------------|--------|-------------------------------|------|-----------|------|-------|
| <b>activated carbon as an anode</b>                                                               |                                                |        |                               |      |           |      |       |
| <b>Polyoxometalate-based binder free electrode</b>                                                | SiW12@PANI/EGC                                 | 0      | 1 M NaCl                      | 3 EL | 117.34    |      | [131] |
| <b>Multifunctional group sulfobutyl ether <math>\beta</math>-cyclodextrin polymer treated CNT</b> | CNT@SBE-b-CDP                                  | 0.244  | 1 M NaCl                      | 3 EL | 13.533333 |      | [132] |
| <b>Radical polymer PTMA</b>                                                                       | PTMA                                           | 0.8    | 1 M NaCl                      | 3 EL | 111       | 100  | [133] |
| <b>BiOCl</b>                                                                                      | BiOCl                                          | -0.256 | 1M NaCl in H <sub>2</sub> O   | 3 El | 92.1      | 400  | [134] |
| <b>CoFe layered double hydroxides (CoFe-Cl-LDH) crosslinked with CNTs (CoFe-Cl-LDH/CNT)</b>       | CoFe-Cl-LDH                                    | -0.3   | 1M NaCl in H <sub>2</sub> O   | 3 El | 190       | 200  | [135] |
| <b>Sb<sub>4</sub>O<sub>5</sub>Cl<sub>2</sub></b>                                                  | Sb <sub>4</sub> O <sub>5</sub> Cl <sub>2</sub> | -0.4   | 1M NaCl in H <sub>2</sub> O   | 3 El | 41        | 600  | [136] |
| <b>Bi@carbon</b>                                                                                  | Bi@carbon                                      | -0.206 | 1M NaCl in H <sub>2</sub> O   | 3 El | 87.9      | 400  | [137] |
| <b>Sb@rGO</b>                                                                                     | Sb@rGO                                         | -0.5   | 1M NaCl in H <sub>2</sub> O   | 3 El | 51.6      | 400  | [138] |
| <b>poly(2,2,6,6-tetramethylpiperidinyl-4-yl vinyl ether) PTVE</b>                                 | PTVE                                           | 0.7    | 0.1M NaCl in H <sub>2</sub> O | 3 El | 131       | 60 C | [139] |
| <b>AgNP-10CB</b>                                                                                  | AgNP-10CB                                      | 0      | 1M NaCl in H <sub>2</sub> O   | 2 EL | 175       | 100  | [140] |
| <b>AgCl-20CNT</b>                                                                                 | AgCl-20CNT                                     | 0      | 1M NaCl in H <sub>2</sub> O   | 2 EL | 140       | 100  | [140] |
| <b>ZnCo-Cl layered double hydroxide</b>                                                           | ZnCo-Cl-LDH                                    | 0      | 1M NaCl in H <sub>2</sub> O   | 3 El | 79.777778 |      | [141] |
| <b>Activated Carbon</b>                                                                           | AC                                             | 0      | 1M NaCl in H <sub>2</sub> O   | 3 El | 24.7      | 100  | [142] |

| Material                                                                    | Formula                 | Average Voltage (V) vs Ag/AgCl sat (KCl) | Electrolyte              | System | Capacitance (F/g) | current density (mA/g) | Rf    |
|-----------------------------------------------------------------------------|-------------------------|------------------------------------------|--------------------------|--------|-------------------|------------------------|-------|
| <b>Polyhedral macrotube carbon arrays</b>                                   | AC_Polyhedral           | -0.456                                   | NaCl                     | 3 EL   | 370               |                        | [143] |
| <b>Porous C from Na<sub>2</sub>EDTA</b>                                     | AC_Na <sub>2</sub> EDTA | -0.5                                     | 1 M NaCl                 | 3 EL   | 140               |                        | [144] |
| <b>Pani/AC</b>                                                              | AC/PANI                 | 0.15                                     | 0.2 M NaCl               | 3 EL   | 213               |                        | [145] |
| <b>Carbon nanotubes in-situ crosslinking the activated carbon electrode</b> | AC/CNCL                 | 0.044                                    | 1 M NaCl                 | 3 EL   | 84                |                        | [146] |
| <b>PVDF derived C/CNT</b>                                                   | AC_PVDF/CNT             | 0.044                                    | 1 M NaCl                 | 3 EL   | 198.9             |                        | [147] |
| <b>Layered double hydroxide coated activated carbon</b>                     | AC@LDH                  | 0.3                                      | 1 M NaCl                 | 3 EL   | 124               |                        | [148] |
| <b>Commercial activated carbon</b>                                          | AC                      | 0.1                                      | 1 M NaCl                 | 3 EL   | 51.8              |                        | [149] |
| <b>Carbon fiber and yak hair</b>                                            | CF/YK                   | 0.444                                    | 2 g L <sup>-1</sup> NaCl | 3 EL   | 219.27            |                        | [150] |
| <b>CF, MW-CNT, SRGO</b>                                                     | CF/CNT                  | -0.456                                   | 1 M NaCl                 | 2 EL   | 128.45            |                        | [151] |
| <b>Sugarcane bagasse</b>                                                    | AC_Sugarcane            | -0.5                                     | 5 mM NaC                 | 3 EL   | 208               |                        | [152] |
| <b>Kelp</b>                                                                 | AC_Kelp                 | -0.456                                   | 1 M NaCl                 | 3 EL   | 190               |                        | [153] |
| <b>Date seeds</b>                                                           | AC_Date seeds           | -0.4                                     | 1 M NaCl                 | 3 EL   | 400               |                        | [154] |
| <b>Yolk-shell</b>                                                           | AC_Yolk-shell           | 0.3                                      | 1 M NaCl                 | 3 EL   | 268.33            |                        | [155] |

|                                                                                                    |                              |       |          |      |        |       |
|----------------------------------------------------------------------------------------------------|------------------------------|-------|----------|------|--------|-------|
| <b>Wasted coffee grounds</b>                                                                       | AC_Coffee grounds            | 0.144 | 1 M NaCl | 3 EL | 180.3  | [156] |
| <b>Xylose</b>                                                                                      | AC_Xylose                    | 0     | 1 M NaCl | 3 EL | 187.6  | [157] |
| <b>Coconut shell</b>                                                                               | AC_Coconut                   | 0     |          | 3 EL | 90.2   | [158] |
| <b>Lotus leaf</b>                                                                                  | AC_Lotus leaf                | 0     | 1 M NaCl | 3 EL | 225    | [159] |
| <b>Lignocellulose</b>                                                                              | AC_Lignocellulose            | 0.3   | 1 M NaCl | 3 EL | 172.9  | [160] |
| <b>Lignin</b>                                                                                      | AC_Lignin                    | -0.5  | 1 M NaCl | 3 EL | 68     | [161] |
| <b>Glucose</b>                                                                                     | AC_Glucose                   | 0     | 1 M NaCl | 3 EL | 71     | [162] |
| <b>Chitin derived biochar</b>                                                                      | AC_Chitin                    | 0     |          | 3 EL | 120    | [163] |
| <b>Carbon polyaniline</b>                                                                          | AC_tire rubber               | 0.5   | 1 M NaCl | 3 EL | 168.2  | [164] |
| <b>Bacterial-cellulose</b>                                                                         | AC_Bacterial-cellulose       | 0     | 1 M NaCl | 3 EL | 335.6  | [165] |
| <b>MOF derived carbon N doped</b>                                                                  | PC_MOF N doped               | 0.5   | 1 M NaCl | 3 EL | 280    | [166] |
| <b>Porous carbon nanosheet N, S codoped</b>                                                        | PC_nanosheet N, S codoped    | 0     | 1 M NaCl | 3 EL | 350    | [167] |
| <b>Porous carbon from waste polystyrene N doped</b>                                                | PC_waste polystyrene N doped | 0.3   | 1 M NaCl | 3 EL | 327    | [168] |
| <b>Mesoporous carbon N doped</b>                                                                   | Mesoporous carbon N doped    | 0.5   | 1 M NaCl | 3 EL | 110    | [169] |
| <b>Microporous carbon N doped</b>                                                                  | Microporous carbon N doped   | 0.5   | 1 M NaCl | 3 EL | 179.2  | [170] |
| <b>Carbon P doped</b>                                                                              | PC_P doped                   | 0     | 1 M NaCl | 3 EL | 160    | [171] |
| <b>MOF-derived Ndoped carbon tubes</b>                                                             | CT_MOF Nd oped               | 0.5   | 1 M NaCl | 3 EL | 280    | [172] |
| <b>AC doped with MOF</b>                                                                           | AC_doped MOF                 | 0.25  | 1 M NaCl | 3 EL | 68     | [173] |
| <b>Nitrogen rich mesoporous carbon derived from ZIF-8</b>                                          | Mesoporous carbon_N doped    | 0.1   | 1 M NaCl | 3 EL | 155.83 | [174] |
| <b>Ag-doped hollow ZIFs-derived nanoporous carbon</b>                                              | PC_Ag doped                  | 0     | 1 M NaCl | 3 EL | 210    | [175] |
| <b>ZIF-8 derived hierarchical carbon Nitrogenincorporated carbon polyhedrons derived from MOFs</b> | ANHC                         | 0     | 1 M NaCl | 3 EL | 360.3  | [176] |
| <b>N-doped rod-like porous carbon derived from dual-ligand metal-organic</b>                       | AC_Polyhedral N doped        | 0.244 | 1 M NaCl | 3 EL | 100.2  | [177] |
| <b>Nanopatterned MOF</b>                                                                           | PC_Nanopatterned             | 0.044 | 1 M NaCl | 3 EL | 277.7  | [173] |
| <b>ZIF-8 derived porous carbon</b>                                                                 | PC_ZIF-8                     | 0     | 1 M NaCl | 3 EL | 195.5  | [178] |
| <b>N,P-doped carbon-Graphene 2D heterostructure</b>                                                | PC/Graphene_N P doped        | 0     | 1 M NaCl | 3 EL | 275.69 | [173] |
| <b>MnFe2O4-rGO composite</b>                                                                       | rGo/MnFe2O4                  | 0.15  |          |      | 228    | [179] |
| <b>Hierarchical Mn3O4 nanowires on rGO</b>                                                         | rGo/Mn3O4 nanowires          | 0.4   | 1 M NaCl | 3 EL | 265    | [180] |
| <b>Hierarchical composite of Ndoped carbon sphere and holey</b>                                    | G_hydrogel N doped           | 0.194 | 1 M NaCl | 3 EL | 437    | [181] |
|                                                                                                    |                              |       |          |      | 226.5  | [182] |

|                                                                 |                    |      |            |      |        |       |
|-----------------------------------------------------------------|--------------------|------|------------|------|--------|-------|
| <b>graphene hydrogel</b>                                        |                    |      |            |      |        |       |
| <b>MnO<sub>2</sub> nanostructures on graphene</b>               | G/MnO <sub>2</sub> | 0.3  |            | 3 EL | 375    | [183] |
| <b>Graphene/CNTs/ZnO NPs</b>                                    | G/CNT/ ZnO NPs     | 0.4  | 1 M NaCl   | 3 EL | 280    | [184] |
| <b>Titanium carbide nanoparticles on graphene nanoflakes</b>    | GNF/TiC            | 0.15 | 0.1 M NaCl | 3 EL | 443    | [185] |
| <b>Solar reduced graphene oxide</b>                             | rGo_solar reduced  | 0.4  | 1 M NaCl   | 3 EL | 126    | [186] |
| <b>Nickel hexacyanoferrate/reduced graphene oxide</b>           | rGo/NiHCF          | 0.5  | 1 M NaCl   | 3 EL | 271    | [187] |
| <b>Tungsten carbide on graphene nanoflakes</b>                  | WC@GNF             | 0.1  | 1 M NaCl   | 3 EL | 580    | [188] |
| <b>Hierarchically porous 3D architectural graphene</b>          | G_HP_3D            | -0.1 | 1 M NaCl   | 3 EL | 190    | [189] |
| <b>Nitrogen and phosphorus doped three-dimensional graphene</b> | G_3D N P doped     | 0    |            |      | 150.88 | [190] |
| <b>Graphene</b>                                                 | G                  | 0    |            |      | 75.18  | [191] |
| <b>Graphene Sponge</b>                                          | G_Sponge           | 0.3  |            |      | 205.2  | [192] |
| <b>Graphene/carbon nanotubes (CNTs) hybrid sponge</b>           | G/CNT_Sponge       | 0    | 0.1 M NaCl |      | 203.48 | [193] |

## References

- [1] G. W. Suter, "Review papers are important and worth writing," *Environmental Toxicology and Chemistry*, vol. 32, no. 9, pp. 1929–1930, Sep. 2013. doi: 10.1002/etc.2316.
- [2] Adrian. Bejan, *Advanced engineering thermodynamics*. Wiley, 2016.
- [3] R. S. Falblsh and H. Ettouney, "MSF nuclear desalination," 2003. [Online]. Available: [www.elsevier.com/locate/desal](http://www.elsevier.com/locate/desal)
- [4] H. El-Dessouky, I. Alatiqi, and H. Ettouney, "Process synthesis: the multi-stage flash desalination system," 1998.
- [5] A. M. K. El-Ghonemy, "Performance test of a sea water multi-stage flash distillation plant: Case study," *Alexandria Engineering Journal*, vol. 57, no. 4, pp. 2401–2413, Dec. 2018, doi: 10.1016/j.aej.2017.08.019.
- [6] R. Borsani and S. Rebagliati, "Fundamentals and costing of MSF desalination plants and comparison with other technologies," *Desalination*, vol. 182, no. 1–3, pp. 29–37, Nov. 2005, doi: 10.1016/j.desal.2005.03.007.
- [7] O. A. Kotb, "Optimum numerical approach of a MSF desalination plant to be supplied by a new specific 650 MW power plant located on the Red Sea in Egypt," *Ain Shams Engineering Journal*, vol. 6, no. 1, pp. 257–265, Mar. 2015, doi: 10.1016/j.asej.2014.09.001.
- [8] Dr. H. Ali El Saie, "Study of the operating conditions for three large MSF desalination units each of capacity 7.2/8.6 MGD (27360/32832 Ton/Day) in Abu Dhabi, UEA.," 1980.
- [9] M. A. Darwish, M. Abdel-Jawad, and G. S. Aly, "Technical and Economical Comparison Between Large Capacity Multi Stage Flash and Reverse Osmosis Desalting Plants," 1989.
- [10] H. T. El-Dessouky, H. M. Ettouney, and Y. Al-Roumi, "Multi-stage flash desalination: present and future outlook."
- [11] M. A. Darwish and A. Alsairafi, "Technical comparison between TVC/MEB and MSF," 2004. [Online]. Available: [www.elsevier.com/locate/desal](http://www.elsevier.com/locate/desal)
- [12] H. Sayyaadi and A. Saffari, "Thermoeconomic optimization of multi effect distillation desalination systems," *Appl Energy*, vol. 87, no. 4, pp. 1122–1133, 2010, doi: 10.1016/j.apenergy.2009.05.023.
- [13] D. Zhao, J. Xue, S. Li, H. Sun, and Q. dong Zhang, "Theoretical analyses of thermal and economical aspects of multi-effect distillation desalination dealing with high-salinity wastewater," *Desalination*, vol. 273, no. 2–3, pp. 292–298, Jun. 2011, doi: 10.1016/j.desal.2011.01.048.
- [14] P. Palenzuela, A. S. Hassan, G. Zaragoza, and D. C. Alarcón-Padilla, "Steady state model for multi-effect distillation case study: Plataforma Solar de Almería MED pilot plant," *Desalination*, vol. 337, no. 1, pp. 31–42, Mar. 2014, doi: 10.1016/j.desal.2013.12.029.

- [15] P. Fiorini and E. Sciubba, “Modular simulation and thermoeconomic analysis of a multi-effect distillation desalination plant,” *Energy*, vol. 32, no. 4, pp. 459–466, 2007, doi: 10.1016/j.energy.2006.07.037.
- [16] R. Deng, L. Xie, H. Lin, J. Liu, and W. Han, “Integration of thermal energy and seawater desalination,” *Energy*, vol. 35, no. 11, pp. 4368–4374, 2010, doi: 10.1016/j.energy.2009.05.025.
- [17] C. Temstet, G. Canton, J. Laborid, and A. Durantd, “A large high-performance MED plant in Sicily,” 1996.
- [18] K. Ansari, H. Sayyaadi, and M. Amidpour, “Thermoeconomic optimization of a hybrid pressurized water reactor (PWR) power plant coupled to a multi effect distillation desalination system with thermo-vapor compressor (MED-TVC),” *Energy*, vol. 35, no. 5, pp. 1981–1996, 2010, doi: 10.1016/j.energy.2010.01.013.
- [19] M. Al-Sahali and H. Ettouney, “Developments in thermal desalination processes: Design, energy, and costing aspects,” *Desalination*, vol. 214, no. 1–3, pp. 227–240, Aug. 2007, doi: 10.1016/j.desal.2006.08.020.
- [20] T. Michels, “Recent achievements of low temperature multiple effect desalination in the western areas of Abu Dhabi, UAE,” 1993.
- [21] U. Fisher, A. Aviram, and A. Gendel, “ASHDOD MULTI-EFFECT LOW TEMPERATURE DESALINATION PLANT REPORT ON YEAR OF OPERATION,” 1985.
- [22] S. O. Al-Habshi, “Simulation and Economic Study of the MED-TVC Units at Umm Al Nar Desalination Plant Part of the Water Resource Management Commons,” 2002. [Online]. Available: [https://scholarworks.uaeu.ac.ae/all\\_thesesTheses.670](https://scholarworks.uaeu.ac.ae/all_thesesTheses.670).  
[https://scholarworks.uaeu.ac.ae/all\\_theses/670](https://scholarworks.uaeu.ac.ae/all_theses/670)
- [23] A. K. Adak and P. K. Tewari, “Technical feasibility study for coupling a desalination plant to an Advanced Heavy Water Reactor,” *Desalination*, vol. 337, no. 1, pp. 76–82, Mar. 2014, doi: 10.1016/j.desal.2013.11.004.
- [24] J. M. Veza, “Mechanical vapour compression desalination plants-A case study,” 1995.
- [25] D. Han, W. F. He, C. Yue, and W. H. Pu, “Study on desalination of zero-emission system based on mechanical vapor compression,” *Appl Energy*, vol. 185, pp. 1490–1496, Jan. 2017, doi: 10.1016/j.apenergy.2015.12.061.
- [26] X. F. Huang, J. Ling, J. C. Xu, Y. Feng, and G. M. Li, “Advanced treatment of wastewater from an iron and steel enterprise by a constructed wetland/ultrafiltration/reverse osmosis process,” *Desalination*, vol. 269, no. 1–3, pp. 41–49, Mar. 2011, doi: 10.1016/j.desal.2010.10.040.
- [27] J. Shen, B. S. Richards, and A. I. Schäfer, “Renewable energy powered membrane technology: Case study of St. Dorcas borehole in Tanzania demonstrating fluoride removal

via nanofiltration/reverse osmosis,” *Sep Purif Technol*, vol. 170, pp. 445–452, Oct. 2016, doi: 10.1016/j.seppur.2016.06.042.

- [28] D. Sambrailo and J. Ivic, “First land-based plant for RO desalination in Croatia,” 2000.
- [29] M. Belkacem, S. Bakhti, and S. Aomraoui, “Groundwater treatment by reverse osmosis: Effect of brine recycling on fouling,” *Desalination Water Treat*, vol. 9, no. 1–3, pp. 54–58, 2009, doi: 10.5004/dwt.2009.752.
- [30] I. H. Aljundi, “Second-law analysis of a reverse osmosis plant in Jordan,” *Desalination*, vol. 239, no. 1–3, pp. 207–215, 2009, doi: 10.1016/j.desal.2008.03.019.
- [31] F. Majali, H. Ettouney, N. Abdel-Jabbar, and H. Qiblawey, “Design and operating characteristics of pilot scale reverse osmosis plants,” *Desalination*, vol. 222, no. 1–3, pp. 441–450, Mar. 2008, doi: 10.1016/j.desal.2007.01.169.
- [32] R. L. Stover, “Seawater reverse osmosis with isobaric energy recovery devices,” *Desalination*, vol. 203, no. 1–3, pp. 168–175, Feb. 2007, doi: 10.1016/j.desal.2006.03.528.
- [33] E. Kalimantan, V. Praptowldodo, and A. Khalik, “Studies on seawater desalination by reverse osmosis at the Badak natural gas liquefaction plant,” 2000.
- [34] M. Busch and W. E. Mickols, “Reducing energy consumption in seawater desalination,” *Desalination*, vol. 165, no. SUPPL., pp. 299–312, Aug. 2004, doi: 10.1016/j.desal.2004.06.035.
- [35] F. Reverberi and A. Gorenflo, “Three year operational experience of a spiral-wound SWRO system with a high fouling potential feed water,” *Desalination*, vol. 203, no. 1–3, pp. 100–106, Feb. 2007, doi: 10.1016/j.desal.2006.05.005.
- [36] M. Petry *et al.*, “The El Coloso (Chile) reverse osmosis plant,” *Desalination*, vol. 203, no. 1–3, pp. 141–152, Feb. 2007, doi: 10.1016/j.desal.2006.05.007.
- [37] S. A. Avlonitis, K. Kouroumbas, and N. Vlachakis, “Energy consumption and membrane replacement cost for seawater RO desalination plants Presented at the EzlropeaII Conjerence on Desalination and the Environment: Fresh Water for All,” European Desalination SocieO~, Internatio~tal Water Association, 2003. [Online]. Available: [www.elsevier.com/locate/desal](http://www.elsevier.com/locate/desal)
- [38] Y. Al-Wazzan, M. Safar, S. Ebrahim, N. Bumey, and A. Mesri, “Desalting of subsurface water using spiral-wound reverse osmosis (RO) system: technical and economic assessment,” ELSEVIER, 2002. [Online]. Available: [www.elsevier.com/locate/desal](http://www.elsevier.com/locate/desal)
- [39] I. Muñoz and A. R. Fernández-Alba, “Reducing the environmental impacts of reverse osmosis desalination by using brackish groundwater resources,” *Water Res*, vol. 42, no. 3, pp. 801–811, 2008, doi: 10.1016/j.watres.2007.08.021.

- [40] D. Prats Rico and M. Chillh Arias, “A reverse osmosis potable water plant at Alicante University: first years of operation,” 2001. [Online]. Available: [www.elsevier.com/bcate/desal](http://www.elsevier.com/bcate/desal)
- [41] M. A. Alghoul, P. Poovanaesvaran, K. Sopian, and M. Y. Sulaiman, “Review of brackish water reverse osmosis (BWRO) system designs,” *Renewable and Sustainable Energy Reviews*, vol. 13, no. 9, pp. 2661–2667, Dec. 2009. doi: 10.1016/j.rser.2009.03.013.
- [42] K. Walha, R. Ben Amar, L. Firdaous, F. Quéméneur, and P. Jaouen, “Brackish groundwater treatment by nanofiltration, reverse osmosis and electrodialysis in Tunisia: performance and cost comparison,” *Desalination*, vol. 207, no. 1–3, pp. 95–106, Mar. 2007, doi: 10.1016/j.desal.2006.03.583.
- [43] M. D. Afonsoa, J. O Jaberb, and M. S. Mohsenb, “Brackish groundwater treatment by reverse osmosis in Jordan,” 2004.
- [44] D. Sambrailo, J. Ivić, and A. Krstulović, “Economic evaluation of the first desalination plant in Croatia,” *Desalination*, vol. 179, no. 1-3 SPEC. ISS., pp. 339–344, Jul. 2005, doi: 10.1016/j.desal.2004.11.080.
- [45] M. Belkacem, S. Bekhti, and K. Bensadok, “Groundwater treatment by reverse osmosis,” *Desalination*, vol. 206, no. 1–3, pp. 100–106, Feb. 2007, doi: 10.1016/j.desal.2006.02.062.
- [46] P. Malek, J. M. Ortiz, and H. M. A. Schulte-Herbrüggen, “Decentralized desalination of brackish water using an electrodialysis system directly powered by wind energy,” *Desalination*, vol. 377, pp. 54–64, Jan. 2016, doi: 10.1016/j.desal.2015.08.023.
- [47] N. Kabay, Ö. Ipek, H. Kahveci, and M. Yüksel, “Effect of salt combination on separation of monovalent and divalent salts by electrodialysis,” *Desalination*, vol. 198, no. 1–3, pp. 84–91, Oct. 2006, doi: 10.1016/j.desal.2006.09.013.
- [48] M. Demircioglu, N. Kabay, I. Kurucaovali, and E. Ersoz, “Demineralization by electrodialysis (ED)-separation performance and cost comparison for monovalent salts.” [Online]. Available: [www.elsevier.com/locate/desal](http://www.elsevier.com/locate/desal)
- [49] T. Chakrabarty *et al.*, “Stable ion-exchange membranes for water desalination by electrodialysis,” *Desalination*, vol. 282, pp. 2–8, Nov. 2011, doi: 10.1016/j.desal.2011.08.009.
- [50] A. H. Galama, M. Saakes, H. Bruning, H. H. M. Rijnaarts, and J. W. Post, “Seawater predesalination with electrodialysis,” *Desalination*, vol. 342, pp. 61–69, Jun. 2014, doi: 10.1016/j.desal.2013.07.012.
- [51] R. Zhao, P. M. Biesheuvel, and A. Van Der Wal, “Energy consumption and constant current operation in membrane capacitive deionization,” *Energy Environ Sci*, vol. 5, no. 11, pp. 9520–9527, Nov. 2012, doi: 10.1039/c2ee21737f.

- [52] Y. J. Kim and J. H. Choi, "Enhanced desalination efficiency in capacitive deionization with an ion-selective membrane," *Sep Purif Technol*, vol. 71, no. 1, pp. 70–75, Jan. 2010, doi: 10.1016/j.seppur.2009.10.026.
- [53] R. Zhao, S. Porada, P. M. Biesheuvel, and A. Van der Wal, "Energy consumption in membrane capacitive deionization for different water recoveries and flow rates, and comparison with reverse osmosis," *Desalination*, vol. 330, pp. 35–41, Dec. 2013, doi: 10.1016/j.desal.2013.08.017.
- [54] J. Lee, S. Kim, C. Kim, and J. Yoon, "Hybrid capacitive deionization to enhance the desalination performance of capacitive techniques," *Energy Environ Sci*, vol. 7, no. 11, pp. 3683–3689, Nov. 2014, doi: 10.1039/c4ee02378a.
- [55] J. H. Lee, W. S. Bae, and J. H. Choi, "Electrode reactions and adsorption/desorption performance related to the applied potential in a capacitive deionization process," *Desalination*, vol. 258, no. 1–3, pp. 159–163, Aug. 2010, doi: 10.1016/j.desal.2010.03.020.
- [56] S. Porada *et al.*, "Water desalination using capacitive deionization with microporous carbon electrodes," *ACS Appl Mater Interfaces*, vol. 4, no. 3, pp. 1194–1199, Mar. 2012, doi: 10.1021/am201683j.
- [57] Joseph C. Farne, "Capacitive Deionization of NaCl and NaNO<sub>3</sub> Solutions with Carbon Aerogel Electrodes".
- [58] P. Długołęcki and A. Van Der Wal, "Energy recovery in membrane capacitive deionization," *Environ Sci Technol*, vol. 47, no. 9, pp. 4904–4910, May 2013, doi: 10.1021/es3053202.
- [59] J. Kang, T. Kim, K. Jo, and J. Yoon, "Comparison of salt adsorption capacity and energy consumption between constant current and constant voltage operation in capacitive deionization," *Desalination*, vol. 352, pp. 52–57, Nov. 2014, doi: 10.1016/j.desal.2014.08.009.
- [60] T. Kim, J. E. Dykstra, S. Porada, A. van der Wal, J. Yoon, and P. M. Biesheuvel, "Enhanced charge efficiency and reduced energy use in capacitive deionization by increasing the discharge voltage," *J Colloid Interface Sci*, vol. 446, pp. 317–326, May 2015, doi: 10.1016/j.jcis.2014.08.041.
- [61] J. Kang, T. Kim, H. Shin, J. Lee, J. I. Ha, and J. Yoon, "Direct energy recovery system for membrane capacitive deionization," *Desalination*, vol. 398, pp. 144–150, Nov. 2016, doi: 10.1016/j.desal.2016.07.025.
- [62] S. Kim, J. Lee, C. Kim, and J. Yoon, "Na<sub>2</sub>FeP<sub>2</sub>O<sub>7</sub> as a Novel Material for Hybrid Capacitive Deionization," *Electrochim Acta*, vol. 203, pp. 265–271, Jun. 2016, doi: 10.1016/j.electacta.2016.04.056.

- [63] X. Gao, A. Omosebi, J. Landon, and K. Liu, "Enhanced Salt Removal in an Inverted Capacitive Deionization Cell Using Amine Modified Microporous Carbon Cathodes," *Environ Sci Technol*, vol. 49, no. 18, pp. 10920–10926, Sep. 2015, doi: 10.1021/acs.est.5b02320.
- [64] Y. H. Liu, H. C. Hsi, K. C. Li, and C. H. Hou, "Electrodeposited manganese dioxide/activated carbon composite as a high-performance electrode material for capacitive deionization," *ACS Sustain Chem Eng*, vol. 4, no. 9, pp. 4762–4770, Sep. 2016, doi: 10.1021/acssuschemeng.6b00974.
- [65] R. Zhao, P. M. Biesheuvel, H. Miedema, H. Bruning, and A. van der Wal, "Charge efficiency: A functional tool to probe the double-layer structure inside of porous electrodes and application in the modeling of capacitive deionization," *Journal of Physical Chemistry Letters*, vol. 1, no. 1, pp. 205–210, Jan. 2010, doi: 10.1021/jz900154h.
- [66] P. M. Biesheuvel, B. Van Limpt, and A. Van Der Wal, "Dynamic adsorption/desorption process model for capacitive deionization," *Journal of Physical Chemistry C*, vol. 113, no. 14, pp. 5636–5640, Apr. 2009, doi: 10.1021/jp809644s.
- [67] A. Omosebi, X. Gao, J. Landon, and K. Liu, "Asymmetric electrode configuration for enhanced membrane capacitive deionization," *ACS Appl Mater Interfaces*, vol. 6, no. 15, pp. 12640–12649, Aug. 2014, doi: 10.1021/am5026209.
- [68] S. Ahualli, G. R. Iglesias, M. M. Fernández, M. L. Jiménez, and Á. V. Delgado, "Use of Soft Electrodes in Capacitive Deionization of Solutions," *Environ Sci Technol*, vol. 51, no. 9, pp. 5326–5333, May 2017, doi: 10.1021/acs.est.6b06181.
- [69] X. Gao, A. Omosebi, J. Landon, and K. Liu, "Surface charge enhanced carbon electrodes for stable and efficient capacitive deionization using inverted adsorption-desorption behavior," *Energy Environ Sci*, vol. 8, no. 3, pp. 897–909, Mar. 2015, doi: 10.1039/c4ee03172e.
- [70] J. Lee, S. Kim, and J. Yoon, "Rocking Chair Desalination Battery Based on Prussian Blue Electrodes," *ACS Omega*, vol. 2, no. 4, pp. 1653–1659, Apr. 2017, doi: 10.1021/acsomega.6b00526.
- [71] M. Pasta, C. D. Wessells, Y. Cui, and F. La Mantia, "A desalination battery," *Nano Lett*, vol. 12, no. 2, pp. 839–843, Feb. 2012, doi: 10.1021/nl203889e.
- [72] T. Kim, C. A. Gorski, and B. E. Logan, "Low Energy Desalination Using Battery Electrode Deionization," *Environ Sci Technol Lett*, vol. 4, no. 10, pp. 444–449, Oct. 2017, doi: 10.1021/acs.estlett.7b00392.
- [73] S. Choi, B. Chang, S. Kim, J. Lee, J. Yoon, and J. W. Choi, "Battery Electrode Materials with Omnivalent Cation Storage for Fast and Charge-Efficient Ion Removal of Asymmetric Capacitive Deionization," *Adv Funct Mater*, vol. 28, no. 35, Aug. 2018, doi: 10.1002/adfm.201802665.

- [74] W. Shi *et al.*, “High-Performance Capacitive Deionization via Manganese Oxide-Coated, Vertically Aligned Carbon Nanotubes,” *Environ Sci Technol Lett*, vol. 5, no. 11, pp. 692–700, Nov. 2018, doi: 10.1021/acs.estlett.8b00397.
- [75] T. Wu *et al.*, “Highly Stable Hybrid Capacitive Deionization with a MnO<sub>2</sub> Anode and a Positively Charged Cathode,” *Environ Sci Technol Lett*, vol. 5, no. 2, pp. 98–102, Feb. 2018, doi: 10.1021/acs.estlett.7b00540.
- [76] S. Hand and R. D. Cusick, “Characterizing the Impacts of Deposition Techniques on the Performance of MnO<sub>2</sub> Cathodes for Sodium Electrosorption in Hybrid Capacitive Deionization,” *Environ Sci Technol*, vol. 51, no. 20, pp. 12027–12034, Oct. 2017, doi: 10.1021/acs.est.7b03060.
- [77] F. Chen, Y. Huang, L. Guo, L. Sun, Y. Wang, and H. Y. Yang, “Dual-ions electrochemical deionization: A desalination generator,” *Energy Environ Sci*, vol. 10, no. 10, pp. 2081–2089, Oct. 2017, doi: 10.1039/c7ee00855d.
- [78] S. Porada, A. Shrivastava, P. Bukowska, P. M. Biesheuvel, and K. C. Smith, “Nickel Hexacyanoferrate Electrodes for Continuous Cation Intercalation Desalination of Brackish Water,” *Electrochim Acta*, vol. 255, pp. 369–378, Nov. 2017, doi: 10.1016/j.electacta.2017.09.137.
- [79] C. Deng, S. Zhang, Z. Dong, and Y. Shang, “1D nanostructured sodium vanadium oxide as a novel anode material for aqueous sodium ion batteries,” *Nano Energy*, vol. 4, pp. 49–55, Mar. 2014, doi: 10.1016/j.nanoen.2013.12.014.
- [80] P. Ramesh Kumar *et al.*, “Na<sub>4</sub>MnV(PO<sub>4</sub>)<sub>3</sub>-rGO as Advanced cathode for aqueous and non-aqueous sodium ion batteries,” *J Power Sources*, vol. 429, pp. 149–155, Jul. 2019, doi: 10.1016/j.jpowsour.2019.04.080.
- [81] Y. Liu, Y. Qiao, X. Lou, X. Zhang, W. Zhang, and Y. Huang, “Hollow K<sub>0.27</sub>MnO<sub>2</sub> Nanospheres as Cathode for High-Performance Aqueous Sodium Ion Batteries,” *ACS Appl Mater Interfaces*, vol. 8, no. 23, pp. 14564–14571, Jun. 2016, doi: 10.1021/acsami.6b03089.
- [82] Y. H. Jung, H. Lim, and D. K. Kim, “Electrochemical characterizations of Na<sub>2</sub>FeP<sub>2</sub>O<sub>7</sub> as an aqueous sodium-ion battery electrode,” 2013.
- [83] X. Wu, Y. Cao, X. Ai, J. Qian, and H. Yang, “A low-cost and environmentally benign aqueous rechargeable sodium-ion battery based on NaTi<sub>2</sub>(PO<sub>4</sub>)<sub>3</sub>-Na<sub>2</sub>NiFe(CN)<sub>6</sub> intercalation chemistry,” *Electrochem Commun*, vol. 31, pp. 145–148, Jun. 2013, doi: 10.1016/j.elecom.2013.03.013.
- [84] Z. Hou, X. Li, J. Liang, Y. Zhu, and Y. Qian, “An aqueous rechargeable sodium ion battery based on a NaMnO<sub>2</sub>-NaTi<sub>2</sub>(PO<sub>4</sub>)<sub>3</sub> hybrid system for stationary energy storage,” *J Mater Chem A Mater*, vol. 3, no. 4, pp. 1400–1404, Jan. 2015, doi: 10.1039/c4ta06018k.

- [85] F. Yin, Z. Liu, Y. Zhao, Y. Feng, and Y. Zhang, "Electrochemical properties of an Na<sub>4</sub>Mn<sub>9</sub>O<sub>18</sub>-reduced graphene oxide composite synthesized via spray drying for an aqueous sodium-ion battery," *Nanomaterials*, vol. 7, no. 9, Sep. 2017, doi: 10.3390/nano7090253.
- [86] J. Dong, G. Zhang, X. Wang, S. Zhang, and C. Deng, "Cross-linked Na<sub>2</sub>VTi(PO<sub>4</sub>)<sub>3</sub>@C hierarchical nanofibers as high-performance bi-functional electrodes for symmetric aqueous rechargeable sodium batteries," *J Mater Chem A Mater*, vol. 5, no. 35, pp. 18725–18736, 2017, doi: 10.1039/c7ta05361d.
- [87] J. Dong, G. Zhang, X. Wang, S. Zhang, and C. Deng, "Cross-linked Na<sub>2</sub>VTi(PO<sub>4</sub>)<sub>3</sub>@C hierarchical nanofibers as high-performance bi-functional electrodes for symmetric aqueous rechargeable sodium batteries," *J Mater Chem A Mater*, vol. 5, no. 35, pp. 18725–18736, 2017, doi: 10.1039/c7ta05361d.
- [88] Z. Zhao, Y. Ye, W. Zhu, L. Xiao, B. Deng, and J. Liu, "Bismuth oxide nanoflake@carbon film: A free-standing battery-type electrode for aqueous sodium ion hybrid supercapacitors," *Chinese Chemical Letters*, vol. 29, no. 4, pp. 629–632, Apr. 2018, doi: 10.1016/j.ccllet.2018.01.011.
- [89] F. Chen, Y. Huang, D. Kong, M. Ding, S. Huang, and H. Y. Yang, "NaTi<sub>2</sub>(PO<sub>4</sub>)<sub>3</sub>-Ag electrodes based desalination battery and energy recovery," *FlatChem*, vol. 8, pp. 9–16, Mar. 2018, doi: 10.1016/j.flatc.2018.02.001.
- [90] H. Gao and J. B. Goodenough, "An Aqueous Symmetric Sodium-Ion Battery with NASICON-Structured Na<sub>3</sub>MnTi(PO<sub>4</sub>)<sub>3</sub>," *Angewandte Chemie*, vol. 128, no. 41, pp. 12960–12964, Oct. 2016, doi: 10.1002/ange.201606508.
- [91] H. Qin, Z. P. Song, H. Zhan, and Y. H. Zhou, "Aqueous rechargeable alkali-ion batteries with polyimide anode," *J Power Sources*, vol. 249, pp. 367–372, 2014, doi: 10.1016/j.jpowsour.2013.10.091.
- [92] D. J. Kim *et al.*, "Diffusion behavior of sodium ions in Na<sub>0.44</sub>MnO<sub>2</sub> in aqueous and non-aqueous electrolytes," *J Power Sources*, vol. 244, pp. 758–763, 2013, doi: 10.1016/j.jpowsour.2013.02.090.
- [93] S. Il Park, I. Gocheva, S. Okada, and J. Yamaki, "Electrochemical Properties of NaTi<sub>2</sub>(PO<sub>4</sub>)<sub>3</sub> Anode for Rechargeable Aqueous Sodium-Ion Batteries," *J Electrochem Soc*, vol. 158, no. 10, p. A1067, 2011, doi: 10.1149/1.3611434.
- [94] J. F. Whitacre, A. Tevar, and S. Sharma, "Na<sub>4</sub>Mn<sub>9</sub>O<sub>18</sub> as a positive electrode material for an aqueous electrolyte sodium-ion energy storage device," *Electrochem commun*, vol. 12, no. 3, pp. 463–466, Mar. 2010, doi: 10.1016/j.elecom.2010.01.020.
- [95] X. Li *et al.*, "Graphene-Supported NaTi<sub>2</sub>(PO<sub>4</sub>)<sub>3</sub> as a High Rate Anode Material for Aqueous Sodium Ion Batteries," *J Electrochem Soc*, vol. 161, no. 6, pp. A1181–A1187, 2014, doi: 10.1149/2.0081409jes.

- [96] C. Deng, S. Zhang, and Y. Wu, "Hydrothermal-assisted synthesis of the Na<sub>7</sub>V<sub>4</sub>(P<sub>2</sub>O<sub>7</sub>)<sub>4</sub>(PO<sub>4</sub>)/C nanorod and its fast sodium intercalation chemistry in aqueous rechargeable sodium batteries," *Nanoscale*, vol. 7, no. 2, pp. 487–491, Jan. 2015, doi: 10.1039/c4nr05175k.
- [97] P. Lei, Y. Wang, F. Zhang, X. Wan, and X. Xiang, "Carbon-Coated Na<sub>2.2</sub>V<sub>1.2</sub>Ti<sub>0.8</sub>(PO<sub>4</sub>)<sub>3</sub> Cathode with Excellent Cycling Performance for Aqueous Sodium-Ion Batteries," *ChemElectroChem*, vol. 5, no. 17, pp. 2482–2487, Sep. 2018, doi: 10.1002/celec.201800379.
- [98] F. Zhang, W. Li, X. Xiang, and M. Sun, "Highly stable Na-storage performance of Na<sub>0.5</sub>Mn<sub>0.5</sub>Ti<sub>0.5</sub>O<sub>2</sub> microrods as cathode for aqueous sodium-ion batteries," *Journal of Electroanalytical Chemistry*, vol. 802, pp. 22–26, Oct. 2017, doi: 10.1016/j.jelechem.2017.08.042.
- [99] A. J. Fernández-Ropero, D. Saurel, B. Acebedo, T. Rojo, and M. Casas-Cabanas, "Electrochemical characterization of NaFePO<sub>4</sub> as positive electrode in aqueous sodium-ion batteries," *J Power Sources*, vol. 291, pp. 40–45, May 2015, doi: 10.1016/j.jpowsour.2015.05.006.
- [100] L. Zhang, T. Huang, and A. Yu, "Carbon-coated Na<sub>3</sub>V<sub>2</sub>(PO<sub>4</sub>)<sub>3</sub> nanocomposite as a novel high rate cathode material for aqueous sodium ion batteries," *J Alloys Compd*, vol. 646, pp. 522–527, Jun. 2015, doi: 10.1016/j.jallcom.2015.05.126.
- [101] P. R. Kumar, Y. H. Jung, C. H. Lim, and D. K. Kim, "Na<sub>3</sub>V<sub>2</sub>O<sub>2x</sub>(PO<sub>4</sub>)<sub>2</sub>F<sub>3-2x</sub>: A stable and high-voltage cathode material for aqueous sodium-ion batteries with high energy density," *J Mater Chem A Mater*, vol. 3, no. 12, pp. 6271–6275, Mar. 2015, doi: 10.1039/c5ta00980d.
- [102] A. J. Fernández-Ropero, M. Zarrabeitia, M. Reynaud, T. Rojo, and M. Casas-Cabanas, "Toward Safe and Sustainable Batteries: Na<sub>4</sub>Fe<sub>3</sub>(PO<sub>4</sub>)<sub>2</sub>P<sub>2</sub>O<sub>7</sub> as a Low-Cost Cathode for Rechargeable Aqueous Na-Ion Batteries," *Journal of Physical Chemistry C*, vol. 122, no. 1, pp. 133–142, Jan. 2018, doi: 10.1021/acs.jpcc.7b09803.
- [103] F. Yu *et al.*, "Electrochemical characterization of P2-type layered Na<sub>2/3</sub>Ni<sub>1/4</sub>Mn<sub>3/4</sub>O<sub>2</sub> cathode in aqueous hybrid sodium/lithium ion electrolyte," *Ceram Int*, vol. 43, no. 13, pp. 9960–9967, 2017, doi: 10.1016/j.ceramint.2017.05.007.
- [104] F. Zhang, W. Li, X. Xiang, and M. Sun, "Highly stable Na-storage performance of Na<sub>0.5</sub>Mn<sub>0.5</sub>Ti<sub>0.5</sub>O<sub>2</sub> microrods as cathode for aqueous sodium-ion batteries," *Journal of Electroanalytical Chemistry*, vol. 802, pp. 22–26, Oct. 2017, doi: 10.1016/j.jelechem.2017.08.042.
- [105] F. Gu *et al.*, "Studies on micron-sized Na<sub>0.7</sub>MnO<sub>2.05</sub> with excellent cycling performance as a cathode material for aqueous rechargeable sodium-ion batteries," *Appl Phys A Mater Sci Process*, vol. 126, no. 8, Aug. 2020, doi: 10.1007/s00339-020-03799-6.

- [106] P. Lei, K. Liu, X. Wan, D. Luo, and X. Xiang, "Ultrafast Na intercalation chemistry of  $\text{Na}_2\text{Ti}_3/2\text{Mn}_{1/2}(\text{PO}_4)_3$  nanodots planted in a carbon matrix as a low cost anode for aqueous sodium-ion batteries," *Chemical Communications*, vol. 55, no. 4, pp. 509–512, 2019, doi: 10.1039/c8cc07668e.
- [107] F. Zhang, W. Li, X. Xiang, and M. Sun, "Nanocrystal-Assembled Porous  $\text{Na}_3\text{MgTi}(\text{PO}_4)_3$  Aggregates as Highly Stable Anode for Aqueous Sodium-Ion Batteries," *Chemistry - A European Journal*, vol. 23, no. 52, pp. 12944–12948, Sep. 2017, doi: 10.1002/chem.201703044.
- [108] N. Arun, V. Aravindan, W. C. Ling, and S. Madhavi, "Carbon coated  $\text{LiTi}_2(\text{PO}_4)_3$  as new insertion anode for aqueous Na-ion batteries," *Journal of Alloys and Compounds*, vol. 603. Elsevier Ltd, pp. 48–51, Aug. 05, 2014. doi: 10.1016/j.jallcom.2014.03.059.
- [109] Y. Wang *et al.*, "A Novel High Capacity Positive Electrode Material with Tunnel-Type Structure for Aqueous Sodium-Ion Batteries," *Adv Energy Mater*, vol. 5, no. 22, Nov. 2015, doi: 10.1002/aenm.201501005.
- [110] Y. Wang *et al.*, "Ultra-low cost and highly stable hydrated  $\text{FePO}_4$  anodes for aqueous sodium-ion battery," *J Power Sources*, vol. 374, pp. 211–216, Jan. 2018, doi: 10.1016/j.jpowsour.2017.10.088.
- [111] L. Shen, Y. Jiang, Y. Liu, J. Ma, T. Sun, and N. Zhu, "High-stability monoclinic nickel hexacyanoferrate cathode materials for ultrafast aqueous sodium ion battery," *Chemical Engineering Journal*, vol. 388, May 2020, doi: 10.1016/j.cej.2020.124228.
- [112] X. Y. Wu *et al.*, "Energetic aqueous rechargeable sodium-ion battery based on  $\text{Na}_2\text{CuFe}(\text{CN})_6\text{-NaTi}_2(\text{PO}_4)_3$  intercalation chemistry," *ChemSusChem*, vol. 7, no. 2, pp. 407–411, Feb. 2014, doi: 10.1002/cssc.201301036.
- [113] K. Krishnamoorthy, P. Pazhamalai, S. Sahoo, J. H. Lim, K. H. Choi, and S. J. Kim, "A High-Energy Aqueous Sodium-Ion Capacitor with Nickel Hexacyanoferrate and Graphene Electrodes," *ChemElectroChem*, vol. 4, no. 12, pp. 3302–3308, Dec. 2017, doi: 10.1002/celec.201700690.
- [114] X. Wu, Y. Cao, X. Ai, J. Qian, and H. Yang, "A low-cost and environmentally benign aqueous rechargeable sodium-ion battery based on  $\text{NaTi}_2(\text{PO}_4)_3\text{-Na}_2\text{NiFe}(\text{CN})_6$  intercalation chemistry," *Electrochem commun*, vol. 31, pp. 145–148, Jun. 2013, doi: 10.1016/j.elecom.2013.03.013.
- [115] K. Nakamoto, R. Sakamoto, M. Ito, A. Kitajou, and S. Okada, "Effect of concentrated electrolyte on aqueous sodium-ion battery with sodium manganese hexacyanoferrate cathode," *Electrochemistry*, vol. 85, no. 4, pp. 179–185, 2017, doi: 10.5796/electrochemistry.85.179.
- [116] A. J. Fernández-Roperro, M. J. Piernas-Muñoz, E. Castillo-Martínez, T. Rojo, and M. Casas-Cabanas, "Electrochemical characterization of  $\text{NaFe}_2(\text{CN})_6$  Prussian Blue as

- positive electrode for aqueous sodium-ion batteries,” *Electrochim Acta*, vol. 210, pp. 352–357, Aug. 2016, doi: 10.1016/j.electacta.2016.05.176.
- [117] D. J. Kim *et al.*, “An aqueous sodium ion hybrid battery incorporating an organic compound and a prussian blue derivative,” *Adv Energy Mater*, vol. 4, no. 12, Aug. 2014, doi: 10.1002/aenm.201400133.
- [118] X. Wu *et al.*, “Low-defect Prussian blue nanocubes as high capacity and long life cathodes for aqueous Na-ion batteries,” *Nano Energy*, vol. 13, pp. 117–123, Apr. 2015, doi: 10.1016/j.nanoen.2015.02.006.
- [119] X. Wu *et al.*, “Vacancy-Free Prussian Blue Nanocrystals with High Capacity and Superior Cyclability for Aqueous Sodium-Ion Batteries,” *ChemNanoMat*, vol. 1, no. 3, pp. 188–193, Jul. 2015, doi: 10.1002/cnma.201500021.
- [120] S. H. M. H. Tehrani, S. A. Seyedsadjadi, and A. Ghaffarinejad, “Application of electrodeposited cobalt hexacyanoferrate film to extract energy from water salinity gradients,” *RSC Adv*, vol. 5, no. 38, pp. 30032–30037, 2015, doi: 10.1039/c5ra03909f.
- [121] J. H. Lee, G. Ali, D. H. Kim, and K. Y. Chung, “Metal-Organic Framework Cathodes Based on a Vanadium Hexacyanoferrate Prussian Blue Analogue for High-Performance Aqueous Rechargeable Batteries,” *Adv Energy Mater*, vol. 7, no. 2, Jan. 2017, doi: 10.1002/aenm.201601491.
- [122] X. Y. Wu *et al.*, “Energetic aqueous rechargeable sodium-ion battery based on Na<sub>2</sub>CuFe(CN)<sub>6</sub>-NaTi<sub>2</sub>(PO<sub>4</sub>)<sub>3</sub> intercalation chemistry,” *ChemSusChem*, vol. 7, no. 2, pp. 407–411, Feb. 2014, doi: 10.1002/cssc.201301036.
- [123] M. Shao *et al.*, “A High-Voltage and Cycle Stable Aqueous Rechargeable Na-Ion Battery Based on Na<sub>2</sub>Zn<sub>3</sub>[Fe(CN)<sub>6</sub>]<sub>2</sub>-NaTi<sub>2</sub>(PO<sub>4</sub>)<sub>3</sub> Intercalation Chemistry,” *ACS Appl Energy Mater*, vol. 2, no. 8, pp. 5809–5815, Aug. 2019, doi: 10.1021/acsaelm.9b00935.
- [124] L. Yang *et al.*, “Flexible and additive-free organic electrodes for aqueous sodium ion batteries,” *J Mater Chem A Mater*, vol. 8, no. 43, pp. 22791–22801, Nov. 2020, doi: 10.1039/d0ta07267b.
- [125] X. Dong, L. Chen, J. Liu, S. Haller, Y. Wang, and Y. Xia, “Environmentally-friendly aqueous Li (or Na)-ion battery with fast electrode kinetics and super-long life,” *Sci Adv*, vol. 2, no. 1, Jan. 2016, doi: 10.1126/sciadv.1501038.
- [126] H. Qin, Z. P. Song, H. Zhan, and Y. H. Zhou, “Aqueous rechargeable alkali-ion batteries with polyimide anode,” *J Power Sources*, vol. 249, pp. 367–372, 2014, doi: 10.1016/j.jpowsour.2013.10.091.
- [127] D. J. Kim *et al.*, “An aqueous sodium ion hybrid battery incorporating an organic compound and a prussian blue derivative,” *Adv Energy Mater*, vol. 4, no. 12, Aug. 2014, doi: 10.1002/aenm.201400133.

- [128] W. Shi *et al.*, “Enabling Superior Sodium Capture for Efficient Water Desalination by a Tubular Polyaniline Decorated with Prussian Blue Nanocrystals,” *Advanced Materials*, vol. 32, no. 33, Aug. 2020, doi: 10.1002/adma.201907404.
- [129] G. Tan, S. Lu, N. Xu, D. Gao, and X. Zhu, “Pseudocapacitive Behaviors of Polypyrrole Grafted Activated Carbon and MnO<sub>2</sub> Electrodes to Enable Fast and Efficient Membrane-Free Capacitive Deionization,” *Environ Sci Technol*, vol. 54, no. 9, pp. 5843–5852, May 2020, doi: 10.1021/acs.est.9b07182.
- [130] P. Nie, J. Yan, G. Zhu, and J. Liu, “Inverted hybrid-capacitive deionization with polyaniline nanotubes doped activated carbon as an anode,” *Electrochim Acta*, vol. 339, Apr. 2020, doi: 10.1016/j.electacta.2020.135920.
- [131] H. Liu, J. Zhang, X. Xu, and Q. Wang, “A Polyoxometalate-Based Binder-Free Capacitive Deionization Electrode for Highly Efficient Sea Water Desalination,” *Chemistry - A European Journal*, vol. 26, no. 19, pp. 4403–4409, Apr. 2020, doi: 10.1002/chem.201905606.
- [132] D. Ma, Y. Wang, Y. Cai, S. Xu, and J. Wang, “Multifunctional group sulfobutyl ether  $\beta$ -cyclodextrin polymer treated CNT as the cathode for enhanced performance in asymmetric capacitive deionization,” *Electrochim Acta*, vol. 313, pp. 321–330, Aug. 2019, doi: 10.1016/j.electacta.2019.05.041.
- [133] Y. Li, Z. Ding, J. Li, K. Wang, T. Lu, and L. Pan, “Novel membrane-free hybrid capacitive deionization with a radical polymer anode for stable desalination,” *Desalination*, vol. 481, May 2020, doi: 10.1016/j.desal.2020.114379.
- [134] F. Chen, Z. Y. Leong, and H. Y. Yang, “An aqueous rechargeable chloride ion battery,” *Energy Storage Mater*, vol. 7, pp. 189–194, Apr. 2017, doi: 10.1016/j.ensm.2017.02.001.
- [135] Z. Wu, Y. Wu, Q. Yuan, J. Zhang, Y. Dou, and J. Han, “Aqueous Chloride-Ion Battery within a Neutral Electrolyte Based on a CoFe-Cl Layered Double Hydroxide Anode,” *ACS Appl Mater Interfaces*, vol. 15, no. 32, pp. 38540–38549, Aug. 2023, doi: 10.1021/acsami.3c09706.
- [136] X. Hu *et al.*, “Electrochemical Performance of Sb<sub>4</sub>O<sub>5</sub>Cl<sub>2</sub> as a New Anode Material in Aqueous Chloride-Ion Battery,” *ACS Appl Mater Interfaces*, vol. 11, no. 9, pp. 9144–9148, Mar. 2019, doi: 10.1021/acsami.8b21652.
- [137] Z. Zhang *et al.*, “The composite electrode of Bi@carbon-texture derived from metal-organic frameworks for aqueous chloride ion battery,” *Ionics (Kiel)*, vol. 26, no. 5, pp. 2395–2403, May 2020, doi: 10.1007/s11581-019-03389-4.
- [138] Q. Zhang *et al.*, “Sb nanoparticle decorated rGO as a new anode material in aqueous chloride ion batteries,” *Nanoscale*, vol. 12, no. 23, pp. 12268–12274, Jun. 2020, doi: 10.1039/d0nr00862a.

- [139] Y. Li, Z. Ding, J. Li, K. Wang, T. Lu, and L. Pan, “Novel membrane-free hybrid capacitive deionization with a radical polymer anode for stable desalination,” *Desalination*, vol. 481, May 2020, doi: 10.1016/j.desal.2020.114379.
- [140] P. Srimuk, S. Husmann, and V. Presser, “Low voltage operation of a silver/silver chloride battery with high desalination capacity in seawater,” *RSC Adv*, vol. 9, no. 26, pp. 14849–14858, 2019, doi: 10.1039/c9ra02570g.
- [141] Z. Zhang and H. Li, “Promoting the uptake of chloride ions by ZnCo-Cl layered double hydroxide electrodes for enhanced capacitive deionization,” *Environ Sci Nano*, vol. 8, no. 7, pp. 1886–1895, Jul. 2021, doi: 10.1039/d1en00350j.
- [142] K. Koshika, N. Sano, K. Oyaizu, and H. Nishide, “An ultrafast chargeable polymer electrode based on the combination of nitroxide radical and aqueous electrolyte,” *Chemical Communications*, no. 7, pp. 836–838, 2009, doi: 10.1039/b818087c.
- [143] X. Ma, Q. Wu, W. A. Wang, S. Lu, Y. Xiang, and D. Aurbach, “Mass-producible polyhedral macrotube carbon arrays with multi-hole cross-section profiles: superb 3D tertiary porous electrode materials for supercapacitors and capacitive deionization cells,” *J Mater Chem A Mater*, vol. 8, no. 32, pp. 16312–16322, Aug. 2020, doi: 10.1039/d0ta00682c.
- [144] G. Tan, Q. Liu, X. Li, Y. Liu, and D. Xiao, “Porous carbon material prepared from Na<sub>2</sub>EDTA and its performance in capacitive deionization process,” *Appl Surf Sci*, vol. 496, Dec. 2019, doi: 10.1016/j.apsusc.2019.07.268.
- [145] R. L. Zornitta *et al.*, “High-performance activated carbon from polyaniline for capacitive deionization,” *Carbon N Y*, vol. 123, pp. 318–333, Oct. 2017, doi: 10.1016/j.carbon.2017.07.071.
- [146] J. Xie, J. Ma, L. Wu, M. Xu, W. Ni, and Y. M. Yan, “Carbon nanotubes in-situ cross-linking the activated carbon electrode for high-performance capacitive deionization,” *Sep Purif Technol*, vol. 239, May 2020, doi: 10.1016/j.seppur.2020.116593.
- [147] Y. Li, J. Qi, W. Zhang, M. Zhang, and J. Li, “Fabrication of polyvinylidene fluoride-derived porous carbon heterostructure with inserted carbon nanotube via phase-inversion coupled with annealing for capacitive deionization application,” *J Colloid Interface Sci*, vol. 554, pp. 353–361, Oct. 2019, doi: 10.1016/j.jcis.2019.06.094.
- [148] J. Lee, S. Kim, N. Kim, C. Kim, and J. Yoon, “Enhancing the desalination performance of capacitive deionization using a layered double hydroxide coated activated carbon electrode,” *Applied Sciences (Switzerland)*, vol. 10, no. 1, Jan. 2020, doi: 10.3390/app10010403.
- [149] N. L. Liu, S. H. Sun, and C. H. Hou, “Studying the electrosorption performance of activated carbon electrodes in batch-mode and single-pass capacitive deionization,” *Sep Purif Technol*, vol. 215, pp. 403–409, May 2019, doi: 10.1016/j.seppur.2019.01.029.

- [150] L. Liu, C. Zhao, F. Zheng, D. Deng, M. A. Anderson, and Y. Wang, “Three-dimensional electrode design with conductive fibers and ordered macropores for enhanced capacitive deionization performance,” *Desalination*, vol. 498, Jan. 2021, doi: 10.1016/j.desal.2020.114794.
- [151] D. J. Ahirrao and N. Jha, “Comparative study on the electrosorption properties of carbon fabric, functionalized multiwall carbon nanotubes and solar reduced graphene oxide for flow through electrode based desalination studies,” *Carbon N Y*, vol. 152, pp. 837–850, Nov. 2019, doi: 10.1016/j.carbon.2019.06.078.
- [152] Y. H. Tang, S. H. Liu, and D. C. W. Tsang, “Microwave-assisted production of CO<sub>2</sub>-activated biochar from sugarcane bagasse for electrochemical desalination,” *J Hazard Mater*, vol. 383, Feb. 2020, doi: 10.1016/j.jhazmat.2019.121192.
- [153] N. Sun *et al.*, “Hierarchical Porous Carbon Materials Derived from Kelp for Superior Capacitive Applications,” *ACS Sustain Chem Eng*, vol. 7, no. 9, pp. 8735–8743, May 2019, doi: 10.1021/acssuschemeng.9b00635.
- [154] A. Hai, G. Bharath, K. R. Babu, H. Taher, M. Naushad, and F. Banat, “Date seeds biomass-derived activated carbon for efficient removal of NaCl from saline solution,” *Process Safety and Environmental Protection*, vol. 129, pp. 103–111, Sep. 2019, doi: 10.1016/j.psep.2019.06.024.
- [155] X. Wei, X. Li, C. Lv, X. Mo, and K. Li, “Hierarchically yolk-shell porous carbon sphere as an electrode material for high-performance capacitive deionization,” *Electrochim Acta*, vol. 354, Sep. 2020, doi: 10.1016/j.electacta.2020.136590.
- [156] M. Qian, X. Y. Xuan, L. K. Pan, and S. Q. Gong, “Porous carbon electrodes from activated wasted coffee grounds for capacitive deionization,” *Ionics (Kiel)*, vol. 25, no. 7, pp. 3443–3452, Jul. 2019, doi: 10.1007/s11581-019-02887-9.
- [157] T. Lu *et al.*, “Highly efficient water desalination by capacitive deionization on biomass-derived porous carbon nanoflakes,” *Sep Purif Technol*, vol. 256, Feb. 2021, doi: 10.1016/j.seppur.2020.117771.
- [158] T. T. Nguyen *et al.*, “Enhanced capacitive deionization performance of activated carbon derived from coconut shell electrodes with low content carbon nanotubes–graphene synergistic hybrid additive,” *Mater Lett*, vol. 292, Jun. 2021, doi: 10.1016/j.matlet.2021.129652.
- [159] G. Liu, L. Qiu, H. Deng, J. Wang, L. Yao, and L. Deng, “Ultrahigh surface area carbon nanosheets derived from lotus leaf with super capacities for capacitive deionization and dye adsorption,” *Appl Surf Sci*, vol. 524, Sep. 2020, doi: 10.1016/j.apsusc.2020.146485.
- [160] T. Lu *et al.*, “High-performance capacitive deionization by lignocellulose-derived eco-friendly porous carbon materials,” *Bull Chem Soc Jpn*, vol. 93, no. 8, pp. 1014–1019, Aug. 2020, doi: 10.1246/bcsj.20200055.

- [161] S. Chaleawler-Umpon and N. Pimpha, "Sustainable lignin-derived hierarchically porous carbon for capacitive deionization applications," *New Journal of Chemistry*, vol. 44, no. 28, pp. 12058–12067, Jul. 2020, doi: 10.1039/d0nj02424d.
- [162] S. K. Mohamed, M. Abuelhamd, N. K. Allam, A. Shahat, M. Ramadan, and H. M. A. Hassan, "Eco-friendly facile synthesis of glucose-derived microporous carbon spheres electrodes with enhanced performance for water capacitive deionization," *Desalination*, vol. 477, Mar. 2020, doi: 10.1016/j.desal.2019.114278.
- [163] P. Li, T. Feng, Z. Song, Y. Tan, and W. Luo, "Chitin derived biochar for efficient capacitive deionization performance," *RSC Adv*, vol. 10, no. 50, pp. 30077–30086, Aug. 2020, doi: 10.1039/d0ra05554a.
- [164] S. F. Evans *et al.*, "Carbon polyaniline capacitive deionization electrodes with stable cycle life," *Desalination*, vol. 464, pp. 25–32, Aug. 2019, doi: 10.1016/j.desal.2019.04.002.
- [165] Y. Li *et al.*, "Phosphorus-doped 3D carbon nanofiber aerogels derived from bacterial-cellulose for highly-efficient capacitive deionization," *Carbon N Y*, vol. 130, pp. 377–383, Apr. 2018, doi: 10.1016/j.carbon.2018.01.035.
- [166] X. Xu *et al.*, "Ultrahigh capacitive deionization performance by 3D interconnected MOF-derived nitrogen-doped carbon tubes," *Chemical Engineering Journal*, vol. 390, Jun. 2020, doi: 10.1016/j.cej.2020.124493.
- [167] X. Min, X. Hu, X. Li, H. Wang, and W. Yang, "Synergistic effect of nitrogen, sulfur-codoping on porous carbon nanosheets as highly efficient electrodes for capacitive deionization," *J Colloid Interface Sci*, vol. 550, pp. 147–158, Aug. 2019, doi: 10.1016/j.jcis.2019.04.082.
- [168] N. Deka, J. Barman, S. Kasthuri, V. Nutalapati, and G. K. Dutta, "Transforming waste polystyrene foam into N-doped porous carbon for capacitive energy storage and deionization applications," *Appl Surf Sci*, vol. 511, May 2020, doi: 10.1016/j.apsusc.2020.145576.
- [169] S. Tian, J. Wu, X. Zhang, K. (Ken) Ostrikov, and Z. Zhang, "Capacitive deionization with nitrogen-doped highly ordered mesoporous carbon electrodes," *Chemical Engineering Journal*, vol. 380, Jan. 2020, doi: 10.1016/j.cej.2019.122514.
- [170] D. Li, X. an Ning, Y. Huang, and S. Li, "Nitrogen-rich microporous carbon materials for high-performance membrane capacitive deionization," *Electrochim Acta*, vol. 312, pp. 251–262, Jul. 2019, doi: 10.1016/j.electacta.2019.04.172.
- [171] H. Wang *et al.*, "Enhanced chloride removal of phosphorus doping in carbon material for capacitive deionization: Experimental measurement and theoretical calculation," *Science of the Total Environment*, vol. 720, Jun. 2020, doi: 10.1016/j.scitotenv.2020.137637.
- [172] J. Zhang, T. Yan, J. Fang, J. Shen, L. Shi, and D. Zhang, "Enhanced capacitive deionization of saline water using N-doped rod-like porous carbon derived from dual-

ligand metal-organic frameworks,” *Environ Sci Nano*, vol. 7, no. 3, pp. 926–937, Mar. 2020, doi: 10.1039/c9en01216h.

- [173] J. Zhang, T. Yan, J. Fang, J. Shen, L. Shi, and D. Zhang, “Enhanced capacitive deionization of saline water using N-doped rod-like porous carbon derived from dual-ligand metal-organic frameworks,” *Environ Sci Nano*, vol. 7, no. 3, pp. 926–937, Mar. 2020, doi: 10.1039/c9en01216h.
- [174] W. Zhang *et al.*, “Core-shell hybrid zeolitic imidazolate framework-derived hierarchical carbon for capacitive deionization,” *J Mater Chem A Mater*, vol. 8, no. 29, pp. 14653–14660, Aug. 2020, doi: 10.1039/d0ta05709f.
- [175] W. Zhang *et al.*, “Core-shell hybrid zeolitic imidazolate framework-derived hierarchical carbon for capacitive deionization,” *J Mater Chem A Mater*, vol. 8, no. 29, pp. 14653–14660, Aug. 2020, doi: 10.1039/d0ta05709f.
- [176] Y. Zhao *et al.*, “Nitrogen-rich mesoporous carbons derived from zeolitic imidazolate framework-8 for efficient capacitive deionization,” *Electrochim Acta*, vol. 321, Oct. 2019, doi: 10.1016/j.electacta.2019.134665.
- [177] J. Kim, J. Kim, J. H. Kim, and H. S. Park, “Hierarchically open-porous nitrogen-incorporated carbon polyhedrons derived from metal-organic frameworks for improved CDI performance,” *Chemical Engineering Journal*, vol. 382, Feb. 2020, doi: 10.1016/j.cej.2019.122996.
- [178] X. Xu *et al.*, “Ultrahigh capacitive deionization performance by 3D interconnected MOF-derived nitrogen-doped carbon tubes,” *Chemical Engineering Journal*, vol. 390, Jun. 2020, doi: 10.1016/j.cej.2020.124493.
- [179] J. Guo *et al.*, “Graphene-carbon 2D heterostructures with hierarchically-porous P,N-doped layered architecture for capacitive deionization,” *Chem Sci*, vol. 12, no. 30, pp. 10334–10340, Aug. 2021, doi: 10.1039/d1sc00915j.
- [180] H. Younes and L. Zou, “Asymmetric configuration of pseudocapacitive composite and rGO electrodes for enhanced capacitive deionization,” *Environ Sci (Camb)*, vol. 6, no. 2, pp. 392–403, Feb. 2020, doi: 10.1039/c9ew01033e.
- [181] G. Bharath *et al.*, “Synthesis of hierarchical Mn<sub>3</sub>O<sub>4</sub> nanowires on reduced graphene oxide nanoarchitecture as effective pseudocapacitive electrodes for capacitive desalination application,” *Electrochim Acta*, vol. 337, Mar. 2020, doi: 10.1016/j.electacta.2020.135668.
- [182] M. Mi, X. Liu, W. Kong, Y. Ge, W. Dang, and J. Hu, “Hierarchical composite of N-doped carbon sphere and holey graphene hydrogel for high-performance capacitive deionization,” *Desalination*, vol. 464, pp. 18–24, Aug. 2019, doi: 10.1016/j.desal.2019.04.014.
- [183] M. A. Jaoude *et al.*, “Morphology-dependent electrochemical performance of MnO<sub>2</sub> nanostructures on graphene towards efficient capacitive deionization,” *Electrochim Acta*, vol. 330, Jan. 2020, doi: 10.1016/j.electacta.2019.135202.

- [184] N. Arora, F. Banat, G. Bharath, and E. Alhseinat, “Capacitive deionization of NaCl from saline solution using graphene/CNTs/ZnO NPs based electrodes,” *J Phys D Appl Phys*, vol. 52, no. 45, Aug. 2019, doi: 10.1088/1361-6463/ab3967.
- [185] A. Yousef, R. M. Abdel Hameed, S. F. Shaikh, A. Abutaleb, M. M. El-Halwany, and A. M. Al-Enizi, “Enhanced electro-adsorption desalination performance of graphene by TiC,” *Sep Purif Technol*, vol. 254, Jan. 2021, doi: 10.1016/j.seppur.2020.117602.
- [186] S. D. Datar, K. Mohanapriya, D. J. Ahirrao, and N. Jha, “Comparative study of electrosorption performance of solar reduced graphene oxide in flow-between and flow-through capacitive deionization architectures,” *Sep Purif Technol*, vol. 257, Feb. 2021, doi: 10.1016/j.seppur.2020.117972.
- [187] Z. Ding, X. Xu, Y. Li, K. Wang, T. Lu, and L. Pan, “Significantly improved stability of hybrid capacitive deionization using nickel hexacyanoferrate/reduced graphene oxide cathode at low voltage operation,” *Desalination*, vol. 468, Oct. 2019, doi: 10.1016/j.desal.2019.114078.
- [188] A. M. Al-Enizi, R. M. Abdel Hameed, M. M. El-Halwany, M. Bakrey, S. F. Shaikh, and A. Yousef, “Tungsten carbide@graphene nanoflakes: Preparation, characterization and electrochemical activity for capacitive deionization technology,” *J Colloid Interface Sci*, vol. 581, pp. 112–125, Jan. 2021, doi: 10.1016/j.jcis.2020.06.089.
- [189] W. Dianbudyanto and S. H. Liu, “Outstanding performance of capacitive deionization by a hierarchically porous 3D architectural graphene,” *Desalination*, vol. 468, Oct. 2019, doi: 10.1016/j.desal.2019.07.009.
- [190] D. C. Han *et al.*, “High-performance capacitive deionization using nitrogen and phosphorus-doped three-dimensional graphene with tunable pore size,” *Electrochim Acta*, vol. 336, Mar. 2020, doi: 10.1016/j.electacta.2020.135639.
- [191] H. Li, T. Lu, L. Pan, Y. Zhang, and Z. Sun, “Electrosorption behavior of graphene in NaCl solutions,” *J Mater Chem*, vol. 19, no. 37, pp. 6773–6779, 2009, doi: 10.1039/b907703k.
- [192] X. Xu, L. Pan, Y. Liu, T. Lu, Z. Sun, and D. H. C. Chua, “Facile synthesis of novel graphene sponge for high performance capacitive deionization,” *Sci Rep*, vol. 5, Feb. 2015, doi: 10.1038/srep08458.
- [193] X. Xu, Z. Sun, D. H. C. Chua, and L. Pan, “Novel nitrogen doped graphene sponge with ultrahigh capacitive deionization performance,” *Sci Rep*, vol. 5, Jun. 2015, doi: 10.1038/srep11225.
